# Supplementary material for: Integrative proteomics and phosphoproteomics in pulmonary arterial hypertension
Source: PubMed Central journal article supplement (PMC6901481; doi:10.1038/s41598-019-55053-6), 2019-12-09
Supplement: 41598_2019_55053_MOESM1_ESM.pdf [file 41598_2019_55053_MOESM1_ESM.pdf]

## Supplementary Information

### **Integrative proteomics and phosphoproteomics in pulmonary arterial hypertension**

**Weiling Xu<sup>1</sup>, Suzy A. A. Comhair<sup>1</sup>, Ruoying Chen<sup>1</sup>, Bo Hu<sup>1</sup>, Yuan Hou<sup>1</sup>, Yadi Zhou<sup>1</sup>, Lori A. Mavrakis<sup>1</sup>, Allison J. Janocha<sup>1</sup>, Ling Li<sup>1</sup>, Dongmei Zhang<sup>1</sup>, Belinda B. Willard<sup>1</sup>, Kewal Asosingh<sup>1</sup>, Feixiong Cheng<sup>1</sup>, Serpil C. Erzurum<sup>1,2\*</sup>**

<sup>1</sup>Lerner Research Institute, Cleveland Clinic, Cleveland, Ohio, United States of America.

<sup>2</sup> Respiratory Institute, Cleveland Clinic, Cleveland, Ohio, United States of America.

\*Corresponding authors: [xuw@ccf.org](mailto:xuw@ccf.org) and [erzurus@ccf.org](mailto:erzurus@ccf.org)

To whom correspondence should be addressed:

Serpil C. Erzurum, M.D.

Cleveland Clinic

9500 Euclid Avenue, NC22

Cleveland, Ohio 44195, USA.

Telephone: 216-445-6624

Fax: 216-444-3279

E-mail: [erzurus@ccf.org](mailto:erzurus@ccf.org)

**List of includes:**

Supplementary Table S1. 2,556 proteins quantified from proteomics  
Supplementary Table S2. 170 differentially expressed proteins in PAH PAEC compared with healthy control PAEC (all  $P < 0.05$ )  
Supplementary Table S3. Canonical pathways of proteins differentially expressed in PAH PAEC  
Supplementary Table S4. Causal networks of proteins differentially expressed in PAH PAEC  
Supplementary Table S5. Biological functions of proteins differentially expressed in PAH PAEC  
Supplementary Table S6. Top diseases and functions in networks of proteins differentially expressed in PAH PAEC  
Supplementary Table S7. 3,609 peptides quantified from phosphoproteomics  
Supplementary Table S8. 240 differentially expressed phosphopeptides in PAH PAEC compared with healthy control PAEC (all  $P < 0.05$ )  
Supplementary Table S9. Canonical pathways of phosphoproteins differentially expressed in PAH PAEC  
Supplementary Table S10. Causal networks of phosphoproteins differentially expressed in PAH PAEC  
Supplementary Table S11. Biological functions of phosphoproteins differentially expressed in PAH PAEC  
Supplementary Table S12. Top diseases and functions in networks of phosphoproteins differentially expressed in PAH PAEC  
Supplementary Table S13. 670 Mitochondrial proteins identified in PAH PAEC and healthy control PAEC  
Supplementary Table S14. 45 mitochondrial proteins differentially expressed in PAH PAEC compared with healthy control PAEC (all  $P < 0.05$ )  
Supplementary Table S15. 366 Mitochondrial phosphopeptides identified in PAH PAEC and healthy control PAEC  
Supplementary Table S16. 18 mitochondrial phosphopeptides differentially expressed between PAH PAEC and healthy control PAEC (all  $P < 0.05$ )  
Supplementary Table S17. Biological functions of mitochondrial proteins differentially expressed in PAH PAEC  
Supplementary Table S18. Top biological processes of mitochondrial phosphoproteins differentially expressed in PAH PAEC  
Supplementary Table S19. Clinical features of study participants for metabolomics  
Supplementary Table S20. Metabolite analysis in PAH versus healthy controls (PAHTCH Study)  
Supplementary Table S21. Purity of PAEC used for all experiments as assessed with CD31

Supplementary Fig. S1 Nontargeted metabolites in PAH  
Supplementary Fig. S2 Targeted HPLC measures of metabolites in PAH  
Supplementary Fig. S3 Mitochondrial protein expression in PAH  
Supplementary Fig. S4 Overall expression of proteins in control PAEC from commercially purchased ( $n = 2$ ) and harvested at Cleveland Clinic ( $n = 3$ )

Supplementary Methods

**Supplementary Table S1. 2,556 proteins quantified from proteomics**

| <b>Protein</b>                                             | <b>Gene</b> | <b>Fold Change</b> | <b>P-value</b> |
|------------------------------------------------------------|-------------|--------------------|----------------|
| Aladin                                                     | AAAS        | 0.9074             | 0.6311         |
| AP2-associated protein kinase 1                            | AAK1        | 0.9302             | 0.3845         |
| Mth938 domain-containing protein                           | AAMDC       | 0.9407             | 0.5520         |
| Angio-associated migratory cell protein                    | AAMP        | 0.9774             | 0.8661         |
| Alanine--tRNA ligase, cytoplasmic                          | AARS        | 1.0521             | 0.6359         |
|                                                            |             |                    |                |
| BUB3-interacting and GLEBS motif-containing protein ZNF207 | ZNF207      | 1.4153             | 0.0581         |
| DBIRD complex subunit ZNF326                               | ZNF326      | 0.9328             | 0.7456         |
| Zinc finger Ran-binding domain-containing protein 2        | ZRANB2      | 1.3499             | 0.0329         |
| Centromere/kinetochore protein zw10 homolog                | ZW10        | 1.3957             | 0.1836         |
| Zyxin                                                      | ZYX         | 1.2211             | 0.0653         |

Fold Change, PAH to healthy controls; *P*-value, PAH vs. healthy controls; NA, not available.

**Supplementary Table S2. 170 differentially expressed proteins in PAH PAEC compared with healthy control PAEC (all  $P < 0.05$ )**

| <b>Gene*</b>       | <b>Upregulated<br/>(PAH/Controls)</b> | <b>P-value</b> | <b>Gene*</b>      | <b>Downregulated<br/>(PAH/Controls)</b> | <b>P-value</b> |
|--------------------|---------------------------------------|----------------|-------------------|-----------------------------------------|----------------|
| UBE2E1             | 2.5300                                | 0.0331         | NPM3              | 0.2270                                  | 0.0436         |
| FOCAD              | 2.0445                                | 0.0011         | <b>NOS3#</b>      | 0.2346                                  | 0.0302         |
| EFEMP1             | 2.0130                                | 0.0196         | NXN               | 0.2841                                  | 0.0086         |
| NEXN               | 1.8559                                | 0.0009         | EBP               | 0.3469                                  | 0.0018         |
| RAB27A             | 1.7973                                | 0.0033         | GIT1              | 0.3785                                  | 0.0146         |
| <b>MTHFD1L#</b>    | 1.7884                                | 0.0404         | NUP188            | 0.4698                                  | 0.0148         |
| NT5DC1             | 1.7659                                | 0.0028         | POLR2B            | 0.5073                                  | 0.0255         |
| RBM12B             | 1.7642                                | 0.0002         | HGS               | 0.5296                                  | 0.0101         |
| WDR5               | 1.7529                                | 0.0212         | LRPAP1            | 0.5333                                  | 0.0389         |
| MRPS31             | 1.7364                                | 0.0017         | MTCH1             | 0.5459                                  | 0.0145         |
| EIF4G3             | 1.7114                                | 0.0384         | PLCG1             | 0.5473                                  | 0.0249         |
| AASDHPPT           | 1.6622                                | 0.0201         | HDHD1             | 0.5669                                  | 0.0483         |
| PRPF4              | 1.6554                                | 0.0022         | MGST1             | 0.5780                                  | 0.0160         |
| PES1               | 1.6012                                | 0.0074         | NRGN              | 0.5905                                  | 0.0094         |
| MPHOSPH10          | 1.5886                                | 0.0085         | CACNA2D1          | 0.5961                                  | 0.0422         |
| PNO1               | 1.5878                                | 0.0114         | SELT              | 0.6142                                  | 0.0076         |
| <b>MRPS7&amp;</b>  | 1.5765                                | 0.0259         | GIMAP1            | 0.6155                                  | 0.0128         |
| GOLPH3             | 1.5519                                | 0.0496         | FKBP2             | 0.6258                                  | 0.0409         |
| ZC3H13             | 1.5519                                | 0.0407         | SEPT6             | 0.6271                                  | 0.0045         |
| ZCCHC8             | 1.5469                                | 0.0031         | SYNE1             | 0.6274                                  | 0.0285         |
| <b>ZC3H4#&amp;</b> | 1.5377                                | 0.0003         | MGARP             | 0.6358                                  | 0.0410         |
| NDUFB7             | 1.5018                                | 0.0009         | PSMG3             | 0.6379                                  | 0.0033         |
| SGTA               | 1.4872                                | 0.0345         | GSN               | 0.6440                                  | 0.0218         |
| USP15              | 1.4805                                | 0.0131         | CD276             | 0.6477                                  | 0.0164         |
| CASP4              | 1.4773                                | 0.0363         | TCIRG1            | 0.6486                                  | 0.0057         |
| SPATS2             | 1.4752                                | 0.0289         | FERMT3            | 0.6586                                  | 0.0010         |
| <b>EIF2A#&amp;</b> | 1.4691                                | 0.0233         | PRKACA            | 0.6621                                  | 0.0294         |
| TGOLN2             | 1.4642                                | 0.0447         | <b>GNA11#</b>     | 0.6665                                  | 0.0062         |
| USP10              | 1.4543                                | 0.0097         | RAB8B             | 0.6776                                  | 0.0289         |
| IGF2BP3            | 1.4536                                | 0.0131         | RAB43             | 0.6784                                  | 0.0177         |
| GIPC1              | 1.4415                                | 0.0221         | CSTB              | 0.6862                                  | 0.0094         |
| TM9SF4             | 1.4288                                | 0.0219         | BDH2              | 0.6889                                  | 0.0106         |
| SF3A2              | 1.4282                                | 0.0083         | <b>PABPN1</b>     | 0.6922                                  | 0.0448         |
| GIGYF2             | 1.4262                                | 0.0025         | RABIF             | 0.6964                                  | 0.0198         |
| KCTD12             | 1.4021                                | 0.0317         | CTBP2             | 0.6967                                  | 0.0195         |
| <b>NME1#</b>       | 1.3751                                | 0.0261         | ACAT2             | 0.6976                                  | 0.0019         |
| NOSIP              | 1.3714                                | 0.0198         | RMDN3             | 0.6986                                  | 0.0484         |
| NACA               | 1.3695                                | 0.0376         | SEP15             | 0.7009                                  | 0.0390         |
| PIPF               | 1.3687                                | 0.0136         | ERGIC2            | 0.7010                                  | 0.0065         |
| USP47              | 1.3634                                | 0.0342         | <b>SOD1</b>       | 0.7019                                  | 0.0432         |
| SEC13              | 1.3631                                | 0.0040         | <b>SNCG#&amp;</b> | 0.7092                                  | 0.0496         |
| CDK9               | 1.3599                                | 0.0240         | AP3M1             | 0.7110                                  | 0.0362         |
| ECI1               | 1.3593                                | 0.0045         | NCKAP1            | 0.7164                                  | 0.0069         |
| YARS2              | 1.3580                                | 0.0310         | TMEM189           | 0.7216                                  | 0.0237         |
| <b>EIF4B#&amp;</b> | 1.3529                                | 0.0187         | UROD              | 0.7229                                  | 0.0075         |
| CSRP1              | 1.3500                                | 0.0459         | NRBP1             | 0.7243                                  | 0.0168         |
| ZRANB2             | 1.3499                                | 0.0329         | DPYSL2            | 0.7270                                  | 0.0490         |
| CNN2               | 1.3382                                | 0.0419         | AKT1              | 0.7279                                  | 0.0187         |
| ARMCX3             | 1.3352                                | 0.0400         | TXNDC17           | 0.7302                                  | 0.0312         |
| RPA1               | 1.3248                                | 0.0171         | PMPCA             | 0.7313                                  | 0.0320         |
| PAF1               | 1.3239                                | 0.0375         | CTSL              | 0.7321                                  | 0.0100         |
| <b>EIF5B</b>       | 1.3075                                | 0.0174         | UBE2I             | 0.7324                                  | 0.0031         |
| PPID               | 1.3068                                | 0.0242         | GBP1              | 0.7328                                  | 0.0082         |
| NUP160             | 1.3042                                | 0.0200         | CNDP2             | 0.7343                                  | 0.0239         |
| <b>SHMT2#</b>      | 1.3038                                | 0.0366         | <b>STAT1&amp;</b> | 0.7344                                  | 0.0095         |
| HMOX2              | 1.3029                                | 0.0111         | TTLL12            | 0.7389                                  | 0.0155         |
| SEPT10             | 1.2971                                | 0.0377         | IDH1              | 0.7392                                  | 0.0199         |

|                    |        |        |                   |        |        |
|--------------------|--------|--------|-------------------|--------|--------|
| ADII               | 1.2875 | 0.0410 | PLCB3             | 0.7397 | 0.0200 |
| FAM96A             | 1.2851 | 0.0122 | TOLLIP            | 0.7398 | 0.0445 |
| RPL3               | 1.2822 | 0.0468 | C16orf62          | 0.7420 | 0.0456 |
| LYAR               | 1.2793 | 0.0093 | ANO6              | 0.7434 | 0.0427 |
| CLPP               | 1.2677 | 0.0134 | CALM3             | 0.7488 | 0.0193 |
| <b>STOML2</b>      | 1.2621 | 0.0276 | APOA1BP           | 0.7496 | 0.0094 |
| NUP88              | 1.2576 | 0.0371 | KIAA0196          | 0.7548 | 0.0224 |
| <b>EIF3C</b>       | 1.2571 | 0.0171 | RPL27             | 0.7571 | 0.0055 |
| RANGAP1            | 1.2541 | 0.0309 | RTN3              | 0.7683 | 0.0227 |
| WDFY1              | 1.2533 | 0.0347 | ESYT2             | 0.7688 | 0.0180 |
| <b>HSPA5#&amp;</b> | 1.2485 | 0.0488 | GBE1              | 0.7706 | 0.0204 |
| NUP155             | 1.2456 | 0.0443 | MAPK1             | 0.7711 | 0.0109 |
| <b>HNRNPH1</b>     | 1.2447 | 0.0214 | SLC25A1           | 0.7732 | 0.0381 |
| MRPL23             | 1.2408 | 0.0490 | CPPED1            | 0.7798 | 0.0164 |
| MRPS28             | 1.2314 | 0.0385 | TRIP6             | 0.7846 | 0.0496 |
| <b>HSP90B1</b>     | 1.2167 | 0.0492 | KRTCAP2           | 0.7939 | 0.0227 |
| GRPEL1             | 1.2124 | 0.0476 | VPS29             | 0.7945 | 0.0199 |
| ALDH18A1           | 1.2121 | 0.0270 | CDIPT             | 0.7989 | 0.0379 |
| PSMD1              | 1.2095 | 0.0434 | KIAA1033          | 0.7989 | 0.0150 |
| SDCBP              | 1.2014 | 0.0462 | VCL               | 0.7991 | 0.0293 |
| MESDC2             | 1.1958 | 0.0478 | LAMC1             | 0.8019 | 0.0230 |
| ADSL               | 1.1923 | 0.0375 | SYNE2             | 0.8020 | 0.0355 |
| <b>XRCC5#</b>      | 1.1836 | 0.0417 | VPS13C            | 0.8052 | 0.0470 |
|                    |        |        | PFN1              | 0.8062 | 0.0350 |
|                    |        |        | EFTUD1            | 0.8131 | 0.0238 |
|                    |        |        | RPL36             | 0.8145 | 0.0460 |
|                    |        |        | <b>CAPN1&amp;</b> | 0.8206 | 0.0327 |
|                    |        |        | GDI1              | 0.8228 | 0.0367 |
|                    |        |        | PLIN3             | 0.8241 | 0.0347 |
|                    |        |        | DENR              | 0.8327 | 0.0446 |
|                    |        |        | GLTP              | 0.8338 | 0.0466 |
|                    |        |        | <b>MOGS#</b>      | 0.8356 | 0.0339 |
|                    |        |        | NUTF2             | 0.8366 | 0.0417 |

\*Find names of proteins in Supplementary Table S1; *P*-value, PAH vs. healthy controls; Bolded text identifies the proteins selected for targeted proteomics; #, indicates the protein is confirmed in the second cohort of PAH samples (*n* = 5) by targeted proteomics; &, identifies those that reach significance of *P* < 0.05, one-tailed.

**Supplementary Table S3. Canonical pathways of proteins differentially expressed in PAH PAEC**

| <b>Ingenuity Canonical Pathways</b>          | <b>P-value of Overlap#</b> | <b>Molecules*</b>                                               |
|----------------------------------------------|----------------------------|-----------------------------------------------------------------|
| EIF2 signaling                               | 0.0001                     | RPL27,EIF3C,AKT1,MAPK1,RPL3,EIF5B,EIF4G3,HSPA5,EIF2A            |
| Nitric oxide signaling                       | 0.0004                     | CALM1 (includes others),HSP90B1,AKT1,MAPK1,PRKACA,NOS3          |
| NOS3 signaling                               | 0.0004                     | CALM1 (includes others),HSP90B1,NOSIP,AKT1,PRKACA,NOS3,HSPA5    |
| Apelin adipocyte signaling pathway           | 0.0007                     | MGST1,MAPK1,GNA11,PRKACA,SOD1                                   |
| Hypoxia signaling                            | 0.0007                     | HSP90B1,AKT1,NOS3,UBE2E1,UBE2I                                  |
| Cholesterol biosynthesis                     | 0.0007                     | EBP,ACAT2,IDI1                                                  |
| Androgen signaling                           | 0.0011                     | CALM1 (includes others),MAPK1,GNA11,CACNA2D1,PRKACA,POLR2B      |
| CREB signaling                               | 0.0017                     | CALM1 (includes others),AKT1,MAPK1,GNA11,CACNA2D1,PRKACA,POLR2B |
| Protein ubiquitination pathway               | 0.0020                     | HSP90B1,USP15,USP47,USP10,PSMD1,HSPA5,UBE2E1,UBE2I              |
| Mevalonate pathway I                         | 0.0022                     | ACAT2,IDI1                                                      |
| IL-22 signaling                              | 0.0023                     | AKT1,MAPK1,STAT1                                                |
| G beta gamma signaling                       | 0.0024                     | AKT1,MAPK1,GNA11,CACNA2D1,PRKACA                                |
| Geranylgeranyldiphosphate biosynthesis I     | 0.0030                     | ACAT2,IDI1                                                      |
| Endocannabinoid cancer inhibition pathway    | 0.0032                     | AKT1,MAPK1,PRKACA,CASP4,NOS3,EIF2A                              |
| Sertoli cell-sertoli cell junction signaling | 0.0041                     | AKT1,MAPK1,PRKACA,VCL,NOS3,RAB8B                                |
| Corticotropin releasing hormone signaling    | 0.0060                     | CALM1 (includes others),MAPK1,CACNA2D1,PRKACA,NOS3              |
| Inhibition of angiogenesis by TSP1           | 0.0065                     | AKT1,MAPK1,NOS3                                                 |
| Apelin endothelial signaling pathway         | 0.0066                     | CALM1 (includes others),AKT1,MAPK1,GNA11,NOS3                   |
| Adrenomedullin signaling pathway             | 0.0074                     | CALM1 (includes others),AKT1,MAPK1,GNA11,PRKACA,NOS3            |
| Citrulline metabolism                        | 0.0078                     | ALDH18A1,NOS3                                                   |
| Glucocorticoid receptor signaling            | 0.0081                     | HSP90B1,AKT1,MAPK1,PRKACA,POLR2B,HSPA5,STAT1,UBE2I              |
| Sirtuin signaling pathway                    | 0.0100                     | PPID,AKT1,MAPK1,NDUFB7,SOD1,NOS3,XRCC5                          |
| Regulation of eIF4 and p70S6K signaling      | 0.0102                     | EIF3C,AKT1,MAPK1,EIF4G3,EIF2A                                   |
| Relaxin signaling                            | 0.0107                     | AKT1,MAPK1,GNA11,PRKACA,NOS3                                    |
| Sumoylation pathway                          | 0.0112                     | GDI1,CTBP2,RPA1,UBE2I                                           |
| RANK signaling                               | 0.0112                     | CALM1 (includes others),AKT1,MAPK1,GSN                          |
| IL-1 signaling                               | 0.0112                     | TOLLIP,MAPK1,GNA11,PRKACA                                       |
| Methylthiopropionate biosynthesis            | 0.0123                     | ADI1                                                            |
| NOS2 signaling                               | 0.0129                     | CALM1 (includes others),MAPK1,STAT1                             |
| GNRH signaling                               | 0.0129                     | CALM1 (includes others),MAPK1,GNA11,CACNA2D1,PRKACA             |
| Amyloid processing                           | 0.0138                     | AKT1,MAPK1,PRKACA                                               |
| Opioid signaling pathway                     | 0.0141                     | CALM1 (includes others),AKT1,MAPK1,CACNA2D1,PRKACA,NOS3         |
| Apelin cardiomyocyte signaling pathway       | 0.0145                     | AKT1,MAPK1,GNA11,NOS3                                           |
| VEGF signaling                               | 0.0155                     | AKT1,MAPK1,VCL,NOS3                                             |
| Germ cell-sertoli cell junction signaling    | 0.0174                     | AKT1,MAPK1,VCL,GSN,RAB8B                                        |
| Apelin muscle signaling pathway              | 0.0182                     | AKT1,NOS3                                                       |
| Unfolded protein response                    | 0.0191                     | HSP90B1,HSPA5,EIF2A                                             |

#The overlap  $P$ -value measures whether there is a statistically significant overlap between the dataset genes and the genes that are regulated by a transcriptional regulator. It is calculated using Fisher's Exact Test, and significance is generally attributed to  $P$ -values  $< 0.01$ ; \*Find names of proteins in Supplementary Table S1.

**Supplementary Table S4. Causal networks of proteins differentially expressed in PAH PAEC**

| <b>Master Regulator</b> | <b>Molecule Type</b>    | <b>P-value of Overlap</b> | <b>Target Molecules in Dataset*</b>              |
|-------------------------|-------------------------|---------------------------|--------------------------------------------------|
| CDC73                   | other                   | 0.0015                    | GBP1, STAT1                                      |
| mir-223                 | microRNA                | 0.0023                    | AKT1, GBP1, GLTP, HNRNPH1, HSP90B1, HSPA5        |
| C1QBP                   | transcription regulator | 0.0024                    | AKT1, GBP1, HNRNPH1, HSP90B1, HSPA5, SNCG, STAT1 |
| EPAS1                   | transcription regulator | 0.0027                    | AKT1, GBP1, HNRNPH1, HSP90B1, HSPA5, NOS3, SNCG  |
| EGFR                    | kinase                  | 0.0031                    | AKT1, GBP1, HNRNPH1, HSP90B1, HSPA5              |
| WT1                     | transcription regulator | 0.0099                    | GSN, HSP90B1, MGST1, SEC13                       |
| mir-374                 | microRNA                | 0.0124                    | AKT1                                             |
| SRI                     | transporter             | 0.0124                    | HSPA5                                            |
| SLC20A1                 | transporter             | 0.0124                    | AKT1                                             |
| CCNH                    | transcription regulator | 0.0124                    | CTBP2                                            |
| MYO1C                   | enzyme                  | 0.0124                    | GSN                                              |

\*Find names of proteins in Supplementary Table S1.



**Supplementary Table S5. Biological functions of proteins differentially expressed in PAH PAEC**

| Categories                                                                                                            | Diseases or Functions Annotation         | P-value of Overlap | Molecules*                                                                                                                                                                                          |
|-----------------------------------------------------------------------------------------------------------------------|------------------------------------------|--------------------|-----------------------------------------------------------------------------------------------------------------------------------------------------------------------------------------------------|
| Cellular Compromise,Inflammatory Response                                                                             | Degranulation of cells                   | <0.0001            | CALM1 (includes others),CNN2,CSTB,FERMT3,GSN,HMOX2,MAPK1,MGST1,PSMD1,RAB27A,SDCBP,SOD1,TCIRG1,TOLLIP,VCL,VPS35L,XRCC5                                                                               |
| Cellular Compromise,Inflammatory Response                                                                             | Degranulation of neutrophils             | 0.0001             | CNN2,CSTB,GSN,HMOX2,MAPK1,MGST1,PSMD1,RAB27A,SDCBP,TCIRG1,TOLLIP,VCL,VPS35L,XRCC5                                                                                                                   |
| Protein Synthesis                                                                                                     | Metabolism of protein                    | 0.0001             | AKT1,CASP4,CSTB,CTSL,EIF2A,EIF3C,EIF4B,EIF4G3,EIF5B,GOLPH3,GSN,HGS,HSP90B1,LAMC1,MRPL23,PFN1,RPL27,RPL3,SOD1,UBE2E1,UBE2I                                                                           |
| Protein Synthesis                                                                                                     | Synthesis of protein                     | 0.0004             | EIF2A,EIF3C,EIF4B,EIF4G3,EIF5B,GOLPH3,MRPL23,RPL27,RPL3,SOD1                                                                                                                                        |
| Immunological Disease                                                                                                 | Hypersensitive reaction                  | 0.0012             | AKT1,CASP4,CTSL,GSN,IDI1,NOS3,STAT1,SYNE2,UBE2I,VCL                                                                                                                                                 |
| Cell Death and Survival                                                                                               | Cell death of cervical cancer cell lines | 0.0022             | AKT1,CASP4,CDK9,GNA11,HNRNPH1,MAPK1,MTCH1,RPA1,SOD1,STAT1,TOLLIP,UBE2I                                                                                                                              |
| Infectious Diseases                                                                                                   | Infection of cells                       | 0.0030             | AKT1,GOLPH3,HGS,HNRNPH1,HSP90B1,HSPA5,MRPL23,NCKAP1,NDUFB7,NRBP1,NUP160,PAF1,RAB8B,RPL3,RTN3,STAT1,UBE2E1                                                                                           |
| RNA Post-Transcriptional Modification                                                                                 | Processing of RNA                        | 0.0031             | HNRNPH1,LYAR,MPHOSPH10,PABPN1,PAF1,PES1,POLR2B,PRKACA,PRPF4,RPL27                                                                                                                                   |
| Cell Death and Survival                                                                                               | Cell death of tumor cell lines           | 0.0033             | ADI1,AKT1,CASP4,CDK9,CNN2,CTBP2,EFEMP1,EIF2A,EIF4B,GNA11,GSN,HNRNPH1,HSPA5,MAPK1,MTCH1,NOS3,PAF1,PPID,PRKACA,RPA1,SOD1,STAT1,STOML2,SYNE1,TOLLIP,TRIP6,UBE2I,USP10,USP47,WDR5,XRCC5                 |
| Cell Death and Survival                                                                                               | Apoptosis of cervical cancer cell lines  | 0.0036             | AKT1,CASP4,CDK9,GNA11,HNRNPH1,MAPK1,MTCH1,RPA1,STAT1,UBE2I                                                                                                                                          |
| Dermatological Diseases and Conditions,Inflammatory Disease,Inflammatory Response,Organismal Injury and Abnormalities | Dermatitis                               | 0.0037             | AKT1,CTSL,GSN,IDI1,NOS3,PSMD1,STAT1,SYNE2,UBE2I,VCL                                                                                                                                                 |
| Infectious Diseases                                                                                                   | Viral infection                          | 0.0037             | AKT1,CACNA2D1,CTBP2,CTSL,EIF3C,FERMT3,GBP1,GOLPH3,HGS,HNRNPH1,HSP90B1,HSPA5,LRPAP1,MAPK1,MRPL23,NCKAP1,NDUFB7,NRBP1,NUP160,PAF1,PRKACA,RAB8B,RPL3,RTN3,STAT1,TCIRG1,UBE2E1,UBE2I                    |
| Infectious Diseases                                                                                                   | Infection of tumor cell lines            | 0.0045             | AKT1,GOLPH3,HGS,HSP90B1,MRPL23,NDUFB7,NRBP1,NUP160,PAF1,RAB8B,STAT1,UBE2E1                                                                                                                          |
| Cell Death and Survival                                                                                               | Apoptosis of tumor cell lines            | 0.0046             | ADI1,AKT1,CASP4,CDK9,CNN2,CTBP2,EFEMP1,EIF2A,EIF4B,GNA11,GSN,HNRNPH1,HSPA5,MAPK1,MTCH1,NOS3,PPID,PRKACA,RPA1,SOD1,STAT1,STOML2,UBE2I,USP10,WDR5,XRCC5                                               |
| Hereditary Disorder,Organismal Injury and Abnormalities,Skeletal and Muscular Disorders                               | Hereditary myopathy                      | 0.0068             | ALDH18A1,CACNA2D1,GOLPH3,GSN,HSP90B1,HSPA5,PABPN1,SDCBP,SYNE1,SYNE2,VCL,WASHC5                                                                                                                      |
| Cell Death and Survival                                                                                               | Apoptosis                                | 0.0072             | ADI1,AKT1,CASP4,CDK9,CNN2,CTBP2,EFEMP1,EIF2A,EIF4B,GNA11,GOLPH3,GSN,HMOX2,HNRNPH1,HSP90B1,HSPA5,LRPAP1,MAPK1,MTCH1,NCKAP1,NOS3,PPID,PRKACA,RPA1,SNCG,SOD1,STAT1,STOML2,UBE2I,USP10,USP47,WDR5,XRCC5 |

|                         |                                           |        |                                                                                                                                                                                                  |
|-------------------------|-------------------------------------------|--------|--------------------------------------------------------------------------------------------------------------------------------------------------------------------------------------------------|
| Infectious Diseases     | Infection by RNA virus                    | 0.0076 | AKT1,CACNA2D1,GOLPH3,HGS,HNRNPH1,HSP90B1,HSPA5,MRPL23,NCKAP1,NDUFB7,NRBP1,NUP160,PAF1,RAB8B,RPL3,RTN3,STAT1,UBE2E1                                                                               |
| Cellular Movement       | Cell movement of breast cancer cell lines | 0.0079 | AKT1,CTSL,GIPC1,GNA11,GOLPH3,LRPAP1,MAPK1,PFN1,SDCBP,UBE2I                                                                                                                                       |
| Neurological Disease    | Progressive neurological disorder         | 0.0139 | CALM1 (includes others),CSTB,GOLPH3,GSN,HMOX2,HSP90B1,HSPA5,MAPK1,NAXE,PFN1,RPL3,SNCG,SOD1                                                                                                       |
| Cell Death and Survival | Cell death of breast cancer cell lines    | 0.0140 | AKT1,EIF4B,HSPA5,MAPK1,NOS3,PPID,PRKACA,SOD1,STAT1,USP47                                                                                                                                         |
| Cellular Movement       | Cell movement of tumor cell lines         | 0.0163 | AKT1,CNDP2,CTBP2,CTSL,EFEMP1,FERMT3,GDI1,GIPC1,GNA11,GOLPH3,HSP90B1,LRPAP1,MAPK1,PFN1,PPID,SDCBP,SNCG,STAT1,TRIP6,UBE2I                                                                          |
| Cell Death and Survival | Necrosis                                  | 0.0172 | ADI1,AKT1,CASP4,CDK9,CNN2,CTBP2,EFEMP1,EIF2A,EIF4B,GNA11,GSN,HMOX2,HNRNPH1,HSPA5,LRPAP1,MAPK1,MTCH1,NOS3,PAF1,PPID,PRKACA,RPA1,SOD1,STAT1,STOML2,SYNE1,TOLLIP,TRIP6,UBE2I,USP10,USP47,WDR5,XRCC5 |

\*Find names of proteins in Supplementary Table S1.

**Supplementary Table S6. Top diseases and functions in networks of proteins differentially expressed in PAH PAEC**

| <b>Networks</b> | <b>Top Diseases and Functions</b>                                                                                  | <b>Focus Molecules#</b> | <b>Molecules* in Network</b>                                                                                                                                                                                                                                                                                                             |
|-----------------|--------------------------------------------------------------------------------------------------------------------|-------------------------|------------------------------------------------------------------------------------------------------------------------------------------------------------------------------------------------------------------------------------------------------------------------------------------------------------------------------------------|
| 1               | Infectious diseases, hematological system development and function, cardiovascular system development and function | 16                      | <b>ADSL, AKT1</b> , APBB3, APP, <b>CALM1</b> (includes others), CCL5, CDC73, <b>CDK9</b> , FGF7, GATA2, <b>GBP1, GNA11</b> , GRN, HBA1/HBA2, HLA-E, <b>HMOX2</b> , HPRT1, IDE, IFIT3, IFITM3, <b>LRPAP1</b> , LY96, <b>MAPK1, NOS3</b> , NRP2, OASL, <b>PAF1, PRKACA</b> , PROC, <b>RTN3</b> , SGPL1, SLC4A7, <b>STAT1, SYNE2, UBE2I</b> |
| 2               | Cellular compromise, cellular function and maintenance, cancer                                                     | 15                      | BAP1, <b>CASP4</b> , CCND1, <b>CSTB</b> , CXXC1, E2F4, <b>ECI1, EIF2A</b> , H2AFZ, <b>HSP90B1, HSPA5</b> , IL7, KMT2C, MEN1, NPAT, PA2G4, <b>PABPN1</b> , PALLD, <b>PFN1, POLR2B, RAB8B, RABIF, RMDN3, RPL27</b> , RPL27A, RPL30, SLC37A4, SPEN, SRI, TADA3, TP53, TPI1, TUBB, <b>WDR5, ZC3H13</b>                                       |
| 3               | Cellular movement, cell-to-cell signaling and interaction, hematological system development and function           | 14                      | CCNH, CD2, CD44, <b>CNDP2, CTBP2</b> , CTSS, <b>EFEMP1, EIF4B</b> , ESR1 F3, <b>FERMT3, GOLPH3</b> , IGFBP2, <b>LAMC1</b> , LMO3, LY96, MAPK14, MITF, <b>NCKAP1, NFAT5, NPM3</b> , PIK3CG, <b>PRPF4, PRPF8</b> , RAC1, RIPK2, SCARB1, TNF, <b>TOLLIP</b> , TP63, <b>TRIP6, VCL</b> , WASF2, <b>XRCC5, YBX1</b>                           |
| 4               | Cell cycle, organismal injury and abnormalities, tissue morphology                                                 | 14                      | AR, <b>ARMCX3</b> , CCDC22, CCDC93, CSF2, <b>CSRP1</b> , ESR2, EZH2, <b>GSN, HNRNPA2B1, KCTD12</b> , MAPK13, MYO1C, <b>NACA</b> , NR3C1, <b>NRBP1</b> , OGA, <b>PPID, PSMD1</b> , PTGES3, <b>RAB27A, RAB43</b> , RBM3, SCARB1, SNX1, SORL1, SPHK1, TGFB1, VPS26A, <b>VPS29, VPS35, VPS35L</b> , WASHC2A/WASHC2C, <b>WASHC4, WASHC5</b>   |
| 5               | Cell death and survival, cell-to-cell signaling and interaction, cellular development                              | 13                      | BAG3, BAX, BCL2, CAV1, <b>CD276, CTSL</b> , EBI3, <b>ESYT2, ESYT3</b> , FGFR1, GLI1, HES1, IFNG, IGF2R, KRAS, KRT19, LGALS3, LGALS3BP, <b>MGST1, MTCH1, NDUFB7</b> , P2RX7, PSEN1, <b>RPA1, RPL3, SDCBP</b> , SLC29A1, SMARCA2, SOCS1, <b>SOD1, SPN, STOML2, SYNE1, TCIRG1, TNFRSF10B</b>                                                |
| 6               | Cellular movement, cancer, organismal injury and abnormalities                                                     | 13                      | ACTN4, <b>AKT1</b> , APPL1, AR, ARFGEF1, ARFGEF2, BUB1B, CDH2, <b>CNN2</b> , CTNNB1, DNAJB6, <b>EBP, EIF4G3</b> , EPAS1, ERG, ESR2, <b>FKBP2, GDI1, GIPC1, GLTP</b> , HDAC3, <b>HGS</b> , IGF1R, IL2RB, JUND, LITAF, <b>NOS3, PELP1, PRKAA1, SEC13, SNCG</b> , SP1, SUZ12, <b>USP10, VPS35</b>                                           |
| 7               | Cancer, cell cycle, cellular development                                                                           | 12                      | <b>ALDH18A1</b> , APC, ARAF, CAV1, <b>CDIPT, CIAO2A</b> , DDX5, DHX9, E2F6, <b>EIF5B</b> , FBL, HK2, HMGA1, <b>HNRNPH1</b> , HNRNPU, HRAS, <b>ID1</b> , IGFBP2, KDM5B, KIT, KMT2A, let-7, <b>MOGS</b> , MYC, NRG1, <b>NUTF2, PES1, PNO1</b> , PROM1, SSB, STUB1, TERT, <b>UBE2I, USP47, YY1</b>                                          |

#Differentially expressed proteins; \*Find names of proteins in bold in Supplementary Table S1.

**Supplementary Table S7. 3,609 peptides quantified from phosphoproteomics**

| <b>Protein</b>                  | <b>Gene</b> | <b>Peptide Sequence</b> | <b>#</b> | <b>Positions<sup>*</sup></b> | <b>Fold Change</b> | <b>P-value</b> |
|---------------------------------|-------------|-------------------------|----------|------------------------------|--------------------|----------------|
| AP2-associated protein kinase 1 | AAK1        | VQTTPPPAVQGQK           | 1        | 606                          | 0.9094             | 0.5095         |
| AP2-associated protein kinase 1 | AAK1        | VGSITPPSSPK             | 2        | 620                          | 1.0606             | 0.7773         |
| AP2-associated protein kinase 1 | AAK1        | VGSITPPSSPK             | 2        | 623                          | 1.0606             | 0.7773         |
| AP2-associated protein kinase 1 | AAK1        | IISDVTHSAVFGVPASK       | 1        | 637                          | 0.9866             | 0.9474         |
| AP2-associated protein kinase 1 | AAK1        | RIISDVTHSAVFGVPASK      | 1        | 640                          | 1.4153             | 0.2570         |
| Zyxin                           | ZYX         | VSSIDIEIDSISSIIDDMTK    | 1        | 150                          | 2.1871             | 0.2744         |
| Zyxin                           | ZYX         | GPPASSPAPAPK            | 1;2      | 259                          | 0.8691             | 0.6629         |
| Zyxin                           | ZYX         | FSPVTPK                 | 1;2      | 267                          | 1.3213             | 0.2977         |
| Zyxin                           | ZYX         | FSPGAPGGSGSQPNQK        | 1        | 281                          | 0.9317             | 0.6388         |
| Zyxin                           | ZYX         | SPGAPGPITIK             | 1        | 344                          | 0.8679             | 0.4847         |

#, number of phosphorylation sites on that specific peptide; <sup>\*</sup>The amino acid residue within the protein that is phosphorylated; Fold Change, PAH to healthy controls; *P*-value, PAH vs. healthy controls; NA, not available.

**Supplementary Table S8. 240 differentially expressed phosphopeptides in PAH PAEC compared with healthy control PAEC (all  $P < 0.05$ )**

| Gene*                      | Positi<br>ons*         | Up<br>regulated<br>(PAH/<br>Controls) | P-value | Proteome<br>(Fold<br>Change) | Gene*             | Positio<br>ns * | Down<br>regulated<br>(PAH/<br>Controls) | P-value | Proteome<br>(Fold<br>Change) |
|----------------------------|------------------------|---------------------------------------|---------|------------------------------|-------------------|-----------------|-----------------------------------------|---------|------------------------------|
| SOGA1                      | 141                    | 5.2073                                | 0.0163  |                              | MTOR              | 1166            | 0.1981                                  | 0.0019  |                              |
| SOGA1                      | 142                    | 5.2073                                | 0.0163  |                              | TMX1              | 247             | 0.1988                                  | 0.0108  | 0.8854                       |
| HNRNPA1                    | 4                      | 4.7206                                | 0.0006  | 0.9915                       | AFAP1             | 668             | 0.2635                                  | 0.0487  |                              |
| PNN                        | 381                    | 4.4304                                | 0.0076  | 1.074                        | TNKS1BP1          | 429             | 0.2887                                  | 0.0072  | 1.2301                       |
| PKN1                       | 69                     | 4.364                                 | 0.0131  | 0.6701                       | NAV1              | 257             | 0.2916                                  | 0.0042  |                              |
| MYL9;MYL<br>12A;MYL12<br>B | 20                     | 4.2779                                | 0.0001  |                              | EIF5B             | 107             | 0.3214                                  | 0.0011  | 1.3075                       |
| MYL9;MYL<br>12A;MYL12<br>B | 19                     | 4.2779                                | 0.0001  |                              | TNIK              | 594             | 0.3347                                  | 0.0169  | 1.1426                       |
| DKC1                       | 455                    | 4.1997                                | 0.0038  | 1.1699                       | AHNAK             | 5720            | 0.3481                                  | 0.0017  | 1.0128                       |
| IWS1                       | 196                    | 4.0305                                | 0.0291  |                              | SEC22B            | 137             | 0.3529                                  | 0.0058  | 1.1563                       |
| IWS1                       | 198                    | 4.0305                                | 0.0291  |                              | FAM129B           | 679             | 0.3681                                  | 0.0196  | 1.018                        |
| NES                        | 471                    | 3.9805                                | 0.0259  | 1.2992                       | GATAD2B           | 135             | 0.3936                                  | 0.0005  |                              |
| ANAPC1                     | 547                    | 3.4354                                | 0.0137  |                              | BRD8              | 128             | 0.4187                                  | 0.0257  |                              |
| ANAPC1                     | 563                    | 3.4354                                | 0.0137  |                              | TBC1D2            | 460             | 0.4285                                  | 0.0026  |                              |
| PHLDB2                     | 493                    | 3.4174                                | 0.0222  |                              | COPB2             | 830             | 0.4299                                  | 0.0113  | 1.0041                       |
| PPFIBP1                    | 280                    | 3.2502                                | 0.0023  |                              | ITPR3             | 1832            | 0.4299                                  | 0.01    | 0.8944                       |
| SACS                       | 3510                   | 3.163                                 | 0.0184  |                              | PDLIM7            | 111             | 0.431                                   | 0.0002  | 1.1093                       |
| FAM117A                    | 213                    | 3.0591                                | 0.0433  |                              | RPLP2             | 79              | 0.4312                                  | 0.0247  | 0.9449                       |
| SEPT2                      | 218                    | 2.998                                 | 0.0002  | 1.0307                       | ANXA2;AN<br>XA2P2 | 22              | 0.4409                                  | 0.0308  |                              |
| ZBTB21                     | 778                    | 2.994                                 | 0.0228  |                              | MAP1B             | 831             | 0.4444                                  | 0.0035  | 0.9811                       |
| BAG3                       | 289                    | 2.8356                                | 0.0099  | 0.9911                       | MAP1B             | 832             | 0.4444                                  | 0.0035  | 0.9811                       |
| CHCHD3                     | 50                     | 2.7993                                | 0.0072  | 0.9942                       | SPECC1L           | 384             | 0.4483                                  | 0.0265  | 0.9528                       |
| MYCT1                      | 138                    | 2.7727                                | 0.0028  | 1.045                        | HDGF              | 125             | 0.4518                                  | 0.0207  | 1.1123                       |
| GORASP2                    | 383                    | 2.7657                                | 0.0005  | 1.1631                       | ANXA1             | 5               | 0.4542                                  | 0.0057  | 0.9903                       |
| C11orf96                   | 399                    | 2.536                                 | 0.0343  |                              | CAAP1             | 167             | 0.4546                                  | 0.0471  |                              |
| MAP3K11                    | 451                    | 2.4548                                | 0.0032  |                              | DCP1A             | 277             | 0.4626                                  | 0.0401  |                              |
| ADD3                       | 647                    | 2.4202                                | 0.0387  | 0.7326                       | DCP1A             | 281             | 0.4626                                  | 0.0401  |                              |
| SASH1                      | 813                    | 2.4095                                | 0.0188  | 1.1726                       | CDK16             | 153             | 0.4701                                  | 0.0235  |                              |
| ARHGEF6                    | 530                    | 2.3761                                | 0.0264  |                              | PLCL1             | 556             | 0.4709                                  | 0.0034  |                              |
| OSBPL3                     | 410                    | 2.3465                                | 0.0388  | 1.6187                       | NIPBL             | 2658            | 0.4717                                  | 0.0408  |                              |
| GNG12                      | 26                     | 2.2892                                | 0.0415  | 0.9847                       | BIN1              | 272             | 0.4728                                  | 0.0393  |                              |
| MYCT1                      | 135                    | 2.2805                                | 0.0458  | 1.045                        | MTA1              | 559             | 0.4735                                  | 0.0217  |                              |
| HSPA12B                    | 46                     | 2.2016                                | 0.0398  |                              | ACACA             | 23              | 0.4764                                  | 0.0014  | 0.9836                       |
| PLEC                       | 4396;4<br>282;42<br>59 | 2.1967                                | 0.0313  | 1.1045                       | HDGF              | 126             | 0.4803                                  | 0.0246  | 1.1123                       |
| ZNF609                     | 1055                   | 2.1818                                | 0.026   |                              | HNRNPA1           | 2               | 0.4827                                  | 0.0335  | 0.9915                       |
| VIM                        | 63                     | 2.1504                                | 0.0147  | 0.9248                       | JUP               | 665             | 0.4864                                  | 0.0034  | 1.2949                       |
| TBC1D9B                    | 435                    | 2.1215                                | 0.0357  | 0.9332                       | MAP1B             | 1801            | 0.4965                                  | 0.0028  | 0.9811                       |
| SDPR                       | 43                     | 2.1185                                | 0.0026  | 0.8585                       | UBE2O             | 515             | 0.4991                                  | 0.0044  |                              |
| WDR44                      | 96                     | 2.1071                                | 0.0267  |                              | RPS6KA4           | 675             | 0.5029                                  | 0.0048  |                              |
| P4HA3                      | 18                     | 2.0869                                | 0.0228  |                              | TMSB4X            | 2               | 0.5156                                  | 0.0206  | 0.711                        |
| TOR1AIP1                   | 143                    | 2.0843                                | 0.0084  |                              | MYH10             | 1952            | 0.5205                                  | 0.0047  | 0.8855                       |
| RRM2                       | 20                     | 2.0782                                | 0.0418  |                              | NFATC2            | 107             | 0.5341                                  | 0.0025  |                              |
| NES                        | 831                    | 2.0743                                | 0.0239  | 1.2992                       | SYNJ1             | 1057            | 0.5353                                  | 0.023   |                              |
| CTNNA1;C<br>TNNA2          | 285                    | 2.0205                                | 0.0421  |                              | DBNL              | 167             | 0.5355                                  | 0.0175  |                              |
| JUN                        | 62                     | 2.011                                 | 0.0254  |                              | ELMSAN1           | 698             | 0.5366                                  | 0.005   |                              |
| FOXK1                      | 60                     | 1.9988                                | 0.0345  |                              | PGM3              | 64              | 0.5366                                  | 0.0321  | 0.8828                       |
| MAP4                       | 507                    | 1.9956                                | 0.0124  | 1.0107                       | SYNPO             | 812             | 0.5379                                  | 0.0035  | 0.9516                       |

|               |      |        |        |               |                 |      |        |        |               |
|---------------|------|--------|--------|---------------|-----------------|------|--------|--------|---------------|
| LPXN          | 19   | 1.9931 | 0.0013 | 1.1444        | IGF2BP2         | 99   | 0.5382 | 0.0279 | 1.2311        |
| SRRM2         | 1112 | 1.9755 | 0.0216 | 1.205         | SART1           | 474  | 0.5421 | 0.0362 | 1.098         |
| TJP2          | 151  | 1.9584 | 0.0071 |               | SART1           | 486  | 0.5421 | 0.0362 | 1.098         |
| HNRNPD        | 82   | 1.9532 | 0.0007 | 1.154         | TXLNA           | 515  | 0.5462 | 0.0143 | 0.9496        |
| ACVRL1        | 160  | 1.9451 | 0.0343 |               | RPS6KA4         | 676  | 0.5466 | 0.0307 |               |
| ERCC5         | 562  | 1.927  | 0.0395 |               | PAXBP1          | 262  | 0.5539 | 0.0474 |               |
| ERCC5         | 563  | 1.927  | 0.0395 |               | NIFK            | 223  | 0.5556 | 0.0421 | 1.277         |
| ROCK2         | 1137 | 1.9216 | 0.0472 | 1.0363        | TBC1D10B        | 658  | 0.56   | 0.0081 |               |
| RPRD2         | 641  | 1.9066 | 0.0439 |               | SDPR            | 37   | 0.5609 | 0.0252 | 0.8585        |
| VAMP4         | 30   | 1.903  | 0.0187 |               | ARHGEF2         | 147  | 0.5656 | 0.0276 |               |
| MACF1         | 5511 | 1.8977 | 0.0324 |               | TGOLN2          | 296  | 0.5661 | 0.0081 | <b>1.4642</b> |
| FAM21C        | 484  | 1.8899 | 0.0127 |               | FLNC            | 2200 | 0.5679 | 0.0104 | 0.9512        |
| RAB11FIP5     | 359  | 1.8613 | 0.0262 |               | ACVRL1          | 161  | 0.5702 | 0.0432 |               |
| TJP2          | 147  | 1.861  | 0.0254 |               | CEP170          | 783  | 0.5722 | 0.0496 |               |
| CDK17         | 122  | 1.8474 | 0.0119 |               | PARP4           | 1504 | 0.5734 | 0.0453 | 0.8527        |
| TNRC18        | 1857 | 1.8346 | 0.0079 |               | SMTN            | 792  | 0.5749 | 0.0055 |               |
| FAM134A       | 330  | 1.8087 | 0.0441 |               | SHANK3          | 254  | 0.5831 | 0.0308 | 0.8023        |
| OSBPL11       | 172  | 1.7964 | 0.0337 |               | PUM1            | 683  | 0.5847 | 0.0435 | 1.5826        |
| ATG9A         | 14   | 1.793  | 0.0378 |               | ATXN2L          | 111  | 0.5866 | 0.0261 | 1.4078        |
| DCAF6         | 657  | 1.7754 | 0.0122 |               | FKBP15          | 1154 | 0.587  | 0.0186 | 1.1182        |
| PPP2R5E       | 6    | 1.772  | 0.0485 |               | HN1L            | 81   | 0.5879 | 0.046  | 1.1219        |
| PAFAH1B2      | 2    | 1.7618 | 0.0365 | 0.8308        | ITSN1           | 315  | 0.6069 | 0.0217 |               |
| SMN1          | 28   | 1.7549 | 0.0216 |               | FGD5            | 552  | 0.6106 | 0.0063 |               |
| GYS1          | 663  | 1.7394 | 0.0474 |               | AP3D1           | 489  | 0.6115 | 0.0345 | 0.961         |
| PLEKHG5       | 903  | 1.7179 | 0.0248 |               | ZNF185          | 466  | 0.6123 | 0.017  | 1.0074        |
| NUFIP2        | 629  | 1.7175 | 0.0235 |               | SNX30           | 40   | 0.6135 | 0.0101 |               |
| GORASP2       | 347  | 1.7139 | 0.0375 | 1.1631        | ATG16L1         | 143  | 0.6141 | 0.0047 |               |
| CTNNA1        | 264  | 1.7124 | 0.0251 | 1.0082        | KHDRBS1         | 20   | 0.6147 | 0.0458 | 1.3572        |
| SNTB2         | 233  | 1.711  | 0.0441 | 0.687         | CEP170          | 860  | 0.6153 | 0.0205 |               |
| PTPN14        | 578  | 1.6994 | 0.0207 | 1.4866        | ERRFI1          | 251  | 0.6209 | 0.0286 |               |
| CDH6          | 786  | 1.6991 | 0.0427 |               | RRAGC;RR<br>AGD | 95   | 0.6226 | 0.0304 |               |
| CTTNBP2N<br>L | 568  | 1.6985 | 0.0085 |               | LIMD1           | 272  | 0.6231 | 0.0474 |               |
| AHNAK         | 3426 | 1.6936 | 0.022  | 1.0128        | MAST4           | 1176 | 0.6239 | 0.037  |               |
| RANBP3        | 265  | 1.6741 | 0.0268 |               | EIF5B           | 113  | 0.6287 | 0.0337 | <b>1.3075</b> |
| SDPR          | 364  | 1.66   | 0.0115 | 0.8585        | NFATC2          | 106  | 0.6318 | 0.0405 |               |
| SACS          | 3514 | 1.6578 | 0.0172 |               | LARP7           | 261  | 0.632  | 0.037  |               |
| DDX55         | 201  | 1.6497 | 0.011  |               | GPSM1           | 470  | 0.6339 | 0.0287 |               |
| NES           | 1521 | 1.646  | 0.0162 | 1.2992        | SDPR            | 284  | 0.634  | 0.0052 | 0.8585        |
| FLNB          | 2298 | 1.6455 | 0.0089 | 1.1969        | NCK1            | 21   | 0.6365 | 0.0338 |               |
| AHNAK         | 511  | 1.6422 | 0.0257 | 1.0128        | MTMR12          | 454  | 0.637  | 0.0178 |               |
| EXOC7         | 250  | 1.6422 | 0.0057 | 0.5979        | RIN2            | 366  | 0.6378 | 0.0103 |               |
| RAB12         | 21   | 1.642  | 0.0311 |               | PCNP            | 147  | 0.6399 | 0.0241 | 1.3716        |
| PRRC2A        | 808  | 1.6336 | 0.0368 | 1.3972        | DOCK5           | 1789 | 0.64   | 0.0206 |               |
| PTRF          | 365  | 1.631  | 0.0222 | 1.2518        | RIOK2           | 335  | 0.6463 | 0.0432 |               |
| MAP4          | 521  | 1.6236 | 0.0299 | 1.0107        | MAP4K4          | 872  | 0.6471 | 0.042  |               |
| PRKD3         | 41   | 1.6184 | 0.0462 |               | CEP131          | 96   | 0.653  | 0.0277 |               |
| TRIM28        | 518  | 1.6161 | 0.048  | 1.0914        | FKBP15          | 1152 | 0.6531 | 0.0097 | 1.1182        |
| CHMP3         | 134  | 1.6032 | 0.0159 |               | MAP7D1          | 118  | 0.6547 | 0.0339 |               |
| CCDC86        | 21   | 1.6022 | 0.0348 |               | SIRT1           | 16   | 0.6633 | 0.0453 |               |
| DNAJC5        | 10   | 1.5948 | 0.0232 |               | SSFA2           | 668  | 0.6642 | 0.0471 |               |
| UBAP2L        | 598  | 1.5793 | 0.0268 | 1.3112        | AHNAK           | 41   | 0.6654 | 0.04   | 1.0128        |
| SCAF11        | 293  | 1.5634 | 0.0188 |               | SRRM2           | 875  | 0.667  | 0.0416 | 1.205         |
| APPL1         | 401  | 1.5537 | 0.0339 | 0.9269        | MIB2            | 309  | 0.6678 | 0.0152 |               |
| SCRIB         | 772  | 1.5464 | 0.0178 |               | USH2A           | 2552 | 0.6717 | 0.0453 |               |
| PA2G4         | 2    | 1.546  | 0.0118 | 1.0456        | TOP2A           | 1247 | 0.6725 | 0.0182 |               |
| NSFL1C        | 114  | 1.5441 | 0.0113 | 1.2115        | PHRF1           | 1202 | 0.6769 | 0.0326 |               |
| ZC3H4         | 1114 | 1.5372 | 0.037  | <b>1.5377</b> | LARP1           | 75   | 0.6775 | 0.0164 | 0.8324        |
| TRIM56        | 469  | 1.5311 | 0.0275 |               | G3BP2           | 225  | 0.6864 | 0.0282 | 1.0487        |
| FLII          | 801  | 1.5172 | 0.0242 | 1.0318        | AHNAK           | 570  | 0.688  | 0.0267 | 1.0128        |
| PXN           | 130  | 1.5165 | 0.0347 | 0.9571        | PFDN4           | 125  | 0.6972 | 0.0263 | 1.111         |

|          |      |        |        |               |         |      |        |        |        |
|----------|------|--------|--------|---------------|---------|------|--------|--------|--------|
| USP8     | 612  | 1.5154 | 0.0193 |               | PLEKHA1 | 308  | 0.6979 | 0.0247 |        |
| PABPN1   | 177  | 1.5112 | 0.0215 | <b>0.6922</b> | PIKFYVE | 210  | 0.6984 | 0.0141 |        |
| HDAC7    | 67   | 1.5107 | 0.0364 |               | NAA10   | 194  | 0.699  | 0.0164 | 1.0659 |
| DDHD1    | 305  | 1.4968 | 0.0362 |               | TP53BP1 | 830  | 0.7059 | 0.0207 | 1.1084 |
| FOXK1    | 265  | 1.4913 | 0.0337 |               | ATP2B1  | 1119 | 0.7173 | 0.0401 |        |
| SRRM2    | 866  | 1.4812 | 0.0228 | 1.205         | HNRNPA0 | 188  | 0.7214 | 0.0469 | 1.1023 |
| FAM114A1 | 196  | 1.48   | 0.0167 | 1.1058        |         |      |        |        |        |
| CTNNA1;C |      |        |        |               |         |      |        |        |        |
| TNNA2    | 284  | 1.4763 | 0.0299 |               |         |      |        |        |        |
| SCRIB    | 1367 | 1.4737 | 0.0119 |               |         |      |        |        |        |
| RABL6    | 470  | 1.4666 | 0.0457 |               |         |      |        |        |        |
| RABL6    | 471  | 1.4666 | 0.0457 |               |         |      |        |        |        |
| FAM122A  | 270  | 1.466  | 0.0136 |               |         |      |        |        |        |
| CCAR2    | 484  | 1.4606 | 0.0406 | 0.9944        |         |      |        |        |        |
| GTPBP1   | 24   | 1.453  | 0.0408 |               |         |      |        |        |        |
| LRRFIP1  | 83   | 1.4354 | 0.0273 | 1.1816        |         |      |        |        |        |
| XPO6     | 190  | 1.4312 | 0.046  |               |         |      |        |        |        |
| CCDC43   | 139  | 1.4302 | 0.0449 |               |         |      |        |        |        |
| PDS5B    | 1370 | 1.4252 | 0.0285 | 1.0796        |         |      |        |        |        |
| SRRM2    | 2121 | 1.4225 | 0.0472 | 1.205         |         |      |        |        |        |
| PCM1     | 93   | 1.3833 | 0.0476 |               |         |      |        |        |        |
| EEF2K    | 18   | 1.3505 | 0.0371 |               |         |      |        |        |        |
| ATRX     | 473  | 1.3321 | 0.0499 |               |         |      |        |        |        |

\*Find names of proteins and peptide sequence in Supplementary Table S7; \*The amino acid residue within the protein that is phosphorylated; *P*-value, PAH vs. healthy controls; Proteome (fold change), ratio of PAH to healthy controls, in bold if *P*-value less than 0.05 PAH vs. healthy controls.

**Supplementary Table S9. Canonical pathways of phosphoproteins differentially expressed in PAH PAEC**

| <b>Ingenuity Canonical Pathways</b>        | <b><i>P</i>-value of Overlap</b> | <b>Molecules*</b>                                           |
|--------------------------------------------|----------------------------------|-------------------------------------------------------------|
| Signaling by Rho family GTPases            | 0.0004                           | MYL9,ROCK2,JUN,ARHGEF6,PIKFYVE,VIM,ARHGEF2,PKN1,GNG12,SEPT2 |
| ILK signaling                              | 0.0019                           | MYL9,FLNB,MTOR,PXN,JUN,ARHGEF6,VIM,TMSB10/TMSB4X            |
| RhoA signaling                             | 0.0030                           | MYL9,ROCK2,PLEKHG5,PIKFYVE,PKN1,SEPT2                       |
| CXCR4 signaling                            | 0.0032                           | MYL9,ROCK2,PXN,JUN,ITPR3,PRKD3,GNG12                        |
| Phospholipase C signaling                  | 0.0040                           | MYL9,AHNAK,ITPR3,ARHGEF6,HDAC7,ARHGEF2,PRKD3,GNG12          |
| Thrombin signaling                         | 0.0100                           | MYL9,ROCK2,ITPR3,ARHGEF6,ARHGEF2,PRKD3,GNG12                |
| Cholecystokinin/Gastrin-mediated signaling | 0.0112                           | ROCK2,PXN,JUN,ITPR3,PRKD3                                   |
| Caveolar-mediated Endocytosis signaling    | 0.0112                           | FLNB,ITSN1,COPB2,CAVIN1                                     |
| RhoGDI signaling                           | 0.0120                           | MYL9,ROCK2,ARHGEF6,PIKFYVE,ARHGEF2,GNG12                    |
| Ephrin B signaling                         | 0.0120                           | ROCK2,PXN,ITSN1,GNG12                                       |
| IL-8 signaling                             | 0.0141                           | MYL9,ROCK2,MTOR,JUN,PRKD3,MAP4K4,GNG12                      |

\*Find names of proteins in Supplementary Table S7.



**Supplementary Table S10. Causal networks of phosphoproteins differentially expressed in PAH PAEC**

| <b>Master Regulator</b> | <b>Molecule Type</b>              | <b>P-value of Overlap</b> | <b>Target Molecules in Dataset*</b> |
|-------------------------|-----------------------------------|---------------------------|-------------------------------------|
| ESR2                    | ligand-dependent nuclear receptor | 0.0067                    | JUN,MTOR                            |
| DYRK1A                  | kinase                            | 0.0344                    | SIRT1                               |
| DYRK3                   | kinase                            | 0.0344                    | SIRT1                               |
| PPP2R2D                 | phosphatase                       | 0.0344                    | ACACA                               |
| FLNA                    | other                             | 0.0344                    | VIM                                 |
| PRKCQ                   | kinase                            | 0.0344                    | ARHGEF6                             |
| NEU3                    | enzyme                            | 0.0422                    | FAM129B,JUN,PXN                     |

\*Find names of proteins in Supplementary Table S7.

**Supplementary Table S11. Biological functions of phosphoproteins differentially expressed in PAH PAEC**

| Categories                                  | Diseases or Functions Annotation | P-value of Overlap | Molecules*                                                                                                                                                                                                                                                                                                                                                                                                                                                                                                                                                                                                                                                                                                                                                                                                                                                                   |
|---------------------------------------------|----------------------------------|--------------------|------------------------------------------------------------------------------------------------------------------------------------------------------------------------------------------------------------------------------------------------------------------------------------------------------------------------------------------------------------------------------------------------------------------------------------------------------------------------------------------------------------------------------------------------------------------------------------------------------------------------------------------------------------------------------------------------------------------------------------------------------------------------------------------------------------------------------------------------------------------------------|
| Cancer,organismal injury and abnormalities  | Incidence of tumor               | 0.0003             | ACVRL1,ADD3,AFAP1,AHNAK,ANXA1,ANXA2,AP3D1,APPL1,ARHGEF2,ARHGEF6,ATG16L1,ATG9A,ATP2B1,ATRX,ATXN2L,BIN1,BRD8,CAVIN1,CAVIN2,CCAR2,CDK16,CEP170,CHCHD3,COPB2,CTNNA1,CTTNBP2NL,DBNL,DDHD1,EEF2K,EIF5B,ERCC5,ERRF1,FGD5,FKBP15,FLII,FLNB,G3BP2,GNG12,GORASP2,HDAC7,HDGF,HSPA12B,ITPR3,ITSN1,JUN,JUP,KHDRBS1,LARP1,LARP7,LIMD1,LPXN,LRRFIP1,MACF1,MAP4,MAP4K4,MAST4,MTA1,MTMR12,MTOR,MYCT1,MYL9,NAV1,NES,NIPBL,OSBPL3,PA2G4,PARP4,PCM1,PDLIM7,PHLDB2,PHRF1,PIKFYVE,PKN1,PLEC,PLEKHG5,PNN,PPFIBP1,PRRC2A,PUM1,PXN,RAB11FIP5,RABL6,RANBP3,RIN2,RIOK2,ROCK2,RPLP2,RPRD2,RRM2,SART1,SASH1,SCAF11,SCRIB,SEC22B,SHANK3,SMTN,SPECC1L,SYNPO,TBC1D9B,TJP2,TMSB10/TMSB4X,TNIK,TNKS1BP1,TOP2A,TRIM28,TXLNA,USH2A,USP8,VIM,WASHC2A/WASHC2C,WDR44,XPO6                                                                                                                                           |
| Cancer,organismal injury and abnormalities  | Head and neck carcinoma          | 0.0004             | ACVRL1,ADD3,AFAP1,AHNAK,ANXA1,ANXA2,AP3D1,APPL1,ARHGEF2,ARHGEF6,ATG16L1,ATG9A,ATP2B1,ATRX,ATXN2L,BIN1,BRD8,CAA P1,CCAR2,CCDC86,CDK16,CEP170,COPB2,CTNNA1,CTTNBP2NL,DBNL,DDHD1,DDX55,EEF2K,EIF5B,ERCC5,FAM114A1,FAM117A,FAM129B,FGD5,FKBP15,FLII,FLNB,FO XK1,G3BP2,GATAD2B,GORASP2,HDAC7,HDGF,HSPA12B,ITPR3,ITSN1,JUN,JUP,KHDRBS1,LARP1,LARP7,LIMD1,L PXN,LRRFIP1,MACF1,MAP4,MAP4K4,MAST4,MIB2,MTA1,MTMR12,MTOR,MYCT1,MYL9,NAA10,NAV1,NES,NIPBL,NUFIP2,OSBPL11,P4HA3,PA2G4,PABPN1,PAFAH1B2,PARP4,PCM1,PDLIM7,PFDN4,PHLDB2,PHRF1,PIKFYVE,PKN1,PLEC,PLEKHG5,PNN,PPFIBP1,PRKD3,PRRC2A,PUM1, PXN,RAB11FIP5,RABL6,RANBP3,RETREG2,RIN2,RIOK2,ROCK2,RPLP2,RPRD2,RRAGC,RRM2,SART1,SASH1,SCAF11,SCRIB,SEPT2,SHANK3,SIRT1,SMN1/SMN2,SMTN,SNTB2,SPECC1L,SYNPO,TBC1D9B,TJP2,TMSB10/TMSB4X,TMX1,TNIK,TNKS1BP1,TOP2A,TRIM28,TRIM56,TXLNA,UBE2O,USH2A,USP8,VIM,WASHC2A/WASHC2C,WDR44,XPO6    |
| Cancer,organismal injury and abnormalities  | Neck neoplasm                    | 0.0005             | ACVRL1,ADD3,AFAP1,AHNAK,ANXA1,ANXA2,AP3D1,APPL1,ARHGEF2,ARHGEF6,ATG16L1,ATG9A,ATP2B1,ATRX,ATXN2L,BIN1,BRD8,CAA P1,CCAR2,CDK16,CEP170,COPB2,CTNNA1,CTTNBP2NL,DBNL,DDHD1,DDX55,EEF2K,EIF5B,ERCC5,FAM114A1,FAM117A,FAM129B,FGD5,FKBP15,FLII,FLNB,FO XK1,G3BP2,GATAD2B,GORASP2,HDAC7,HDGF,HSPA12B,ITPR3,ITSN1,JUP,KHDRBS1,LARP1,LARP7,LIMD1,LPXN,LRRFIP1,MACF1,MAP4,MAP4K4,MAST4,MIB2,MTA1,MTMR12,MTOR,MYCT1,MYL9,NAA10,NAV1,NES,NIPBL,OSBPL11,P4HA3,PA2G4,PABPN1,PAFAH1B2,PARP4,PCM1,PDLIM7,PFDN4,PHLDB2,PHRF1,PIKFYVE,PKN1,PLEC,PLEKHG5,PNN,PPFIBP1,PRKD3,PRRC2A,PUM1, PXN,RAB11FIP5,RABL6,RANBP3,RETREG2,RIN2,RIOK2,ROCK2,RPLP2,RPRD2,RRAGC,RRM2,SART1,SASH1,SCAF11,SCRIB,SEPT2,SHANK3,SIRT1,SMN1/SMN2,SMTN,SNTB2,SPECC1L,SYNPO,TBC1D9B,TJP2,TMSB10/TMSB4X,TMX1,TNIK,TNKS1BP1,TOP2A,TRIM28,TRIM56,TXLNA,UBE2O,USH2A,USP8,VIM,WASHC2A/WASHC2C,WDR44,XPO6                       |
| cCancer,organismal injury and abnormalities | Head and neck tumor              | 0.0005             | ACVRL1,ADD3,AFAP1,AHNAK,ANXA1,ANXA2,AP3D1,APPL1,ARHGEF2,ARHGEF6,ATG16L1,ATG9A,ATP2B1,ATRX,ATXN2L,BAG3,BIN1,BRD8,CAAP1,CCAR2,CCDC86,CDK16,CEP170,COPB2,CTNNA1,CTTNBP2NL,DBNL,DDHD1,DDX55,EEF2K,EIF5B,ERCC5,FAM114A1,FAM117A,FAM129B,FGD5,FKBP15,FLII,FLNB,FO XK1,G3BP2,GATAD2B,GORASP2,HDAC7,HDGF,HSPA12B,ITPR3,ITSN1,JUN,JUP,KHDRBS1,LARP1,LARP7,LIMD1,LPXN,LRRFIP1,MACF1,MAP4,MAP4K4,MAST4,MIB2,MTA1,MTMR12,MTOR,MYCT1,MYL9,NAA10,NAV1,NES,NIPBL,NUFIP2,OSBPL11,P4HA3,PA2G4,PABPN1,PAFAH1B2,PARP4,PCM1,PDLIM7,PFDN4,PHLDB2,PHRF1,PIKFYVE,PKN1,PLEC,PLEKHG5,PNN,PPFIBP1,PRKD3,PRRC2A,PUM1, PXN,RAB11FIP5,RABL6,RANBP3,RETREG2,RIN2,RIOK2,ROCK2,RPLP2,RPRD2,RRAGC,RRM2,SART1,SASH1,SCAF11,SCRIB,SEPT2,SHANK3,SIRT1,SMN1/SMN2,SMTN,SNTB2,SPECC1L,SYNPO,TBC1D9B,TJP2,TMSB10/TMSB4X,TMX1,TNIK,TNKS1BP1,TOP2A,TRIM28,TRIM56,TXLNA,UBE2O,USH2A,USP8,VIM,WASHC2A/WASHC2C,WDR44,XPO6 |

|                                                                     |                                 |        |                                                                                                                                                                                                                                                                                                                                                                                                                                                                                                                                                                                                                                                                                                                                                                                                         |
|---------------------------------------------------------------------|---------------------------------|--------|---------------------------------------------------------------------------------------------------------------------------------------------------------------------------------------------------------------------------------------------------------------------------------------------------------------------------------------------------------------------------------------------------------------------------------------------------------------------------------------------------------------------------------------------------------------------------------------------------------------------------------------------------------------------------------------------------------------------------------------------------------------------------------------------------------|
|                                                                     |                                 |        | MSB10/TMSB4X,TMX1,TNIK,TNKS1BP1, TOP2A,TRIM28,TRIM56,TXLNA,UBE2O,USH2A,USP8,VIM,WASHC2A/WASHC2C,WDR44,XPO6                                                                                                                                                                                                                                                                                                                                                                                                                                                                                                                                                                                                                                                                                              |
| Cancer,organismal injury and abnormalities                          | Development of carcinoma        | 0.0005 | ACVRL1,ADD3,AFAP1,AHNAK,ANXA1,ANXA2,AP3D1,APPL1,ARHGEF2,ARHGEF6,ATG16L1,ATG9A,ATP2B1,ATRX,ATXN2L,BIN1,BRD8,CAVIN1,CCAR2,CDK16,CEP170,CHCHD3,COPB2,CTNNA1,CTTNBP2NL,DDHD1,EEF2K,EIF5B,ERCC5,ERRF1,FGD5,FKBP15,FLII,FLNB,G3BP2,GNG12,GORASP2,HDGF,HSPA12B,ITPR3,ITSN1,JUN,JUP,KHDRBS1,LARP1,LARP7,LIMD1,LPXN,LRRFIP1,MACF1,MAP4,MAP4K4,MAST4,MTA1,MTMR12,MTOR,MYCT1,MYL9,NAV1,NES,NIPBL,OSBPL3,PA2G4,PARP4,PCM1,PDLIM7,PHLDB2,PHRF1,PIKFYVE,PKN1,PLEC,PLEKHG5,PNN,PPFIBP1,PRRC2A,PUM1,PXN,RAB11FIP5,RAB12,RABL6,RANBP3,RIN2,RIOK2,ROCK2,RPLP2,RPRD2,RRM2,SART1,SASH1,SCAF11,SCRIB,SHANK3,SMTN,SPECC1L,SYNPO,TBC1D9B,TJP2,TNIK,TNKS1BP1, TOP2A,TRIM28,TXLNA,USH2A,USP8,VIM,WASHC2A/WASHC2C,WDR44,XPO6                                                                                                      |
| Cancer,gastrointestinal disease,organismal injury and abnormalities | Gastrointestinal adenocarcinoma | 0.0007 | ACVRL1,ADD3,AFAP1,AHNAK,ANXA1,AP3D1,APPL1,ARHGEF2,ARHGEF6,ATG16L1,ATG9A,ATP2B1,ATRX,ATXN2L,BAG3,BRD8,CAAP1,CAVIN1,CCAR2,CCDC86,CDK16,CEP170,CHCHD3,COPB2,CTNNA1,CTTNBP2NL,DBNL,DDHD1,DDX55,EEF2K,EIF5B,ERCC5,ERRF1,FAM114A1,FAM129B,FGD5,FKBP15,FLII,FLNB,FOXK1,G3BP2,GATAD2B,GNG12,GORASP2,HDAC7,HDGF,HSPA12B,ITPR3,ITSN1,JUN,JUP,KHDRBS1,LARP1,LARP7,LIMD1,LPXN,LRRFIP1,MACF1,MAP4,MAP4K4,MAST4,MIB2,MTA1,MTMR12,MTOR,MYCT1,MYL9,NAV1,NES,NIPBL,NUFIP2,OSBPL11,OSBPL3,PAFAH1B2,PARP4,PCM1,PDLIM7,PFDN4,PHLDB2,PHRF1,PIKFYVE,PKN1,PLEC,PLEKHG5,PNN,PPFIBP1,PRKD3,PRRC2A,PUM1,PXN,RAB11FIP5,RAB12,RABL6,RANBP3,RETREG2,RIN2,RIOK2,ROCK2,RPLP2,RPRD2,SASH1,SCAF11,SCRIB,SHANK3,SIRT1,SMTN,SNTB2,SPECC1L,SYNPO,TBC1D9B,TJP2,TMX1,TNIK,TNKS1BP1, TOP2A,TRIM28,TRIM56,TXLNA,UBE2O,USH2A,USP8,VIM,WDR44,XPO6 |

\*Find names of proteins in Supplementary Table S7.

**Supplementary Table S12. Top diseases and functions in networks of phosphoproteins differentially expressed in PAH PAEC**

| Networks | Top Diseases and Functions                                                                                 | Focus Molecules# | Molecules* in Network                                                                                                                                                                                                                                                                                                                                                                                                                                                                                                                                          |
|----------|------------------------------------------------------------------------------------------------------------|------------------|----------------------------------------------------------------------------------------------------------------------------------------------------------------------------------------------------------------------------------------------------------------------------------------------------------------------------------------------------------------------------------------------------------------------------------------------------------------------------------------------------------------------------------------------------------------|
| 1        | RNA post-transcriptional modification, cellular development, cellular growth and proliferation             | 21               | <b>AHNAK</b> , <b>ANXA2</b> , <b>ARHGEF2</b> , <b>CTNNA1</b> , <b>FLII</b> , <b>G3BP1</b> , <b>G3BP2</b> , <b>HDGF</b> , <b>HNRNPR</b> , <b>ILK</b> , <b>JUN</b> , <b>KHDRBS1</b> , <b>LRRFIP1</b> , <b>MAP4</b> , <b>MAPK7</b> , <b>MSN</b> , <b>PA2G4</b> , <b>PABPN1</b> , <b>PKN1</b> , <b>PLEC</b> , <b>PNN</b> , <b>PPM1D</b> , <b>PPP2R1A</b> , <b>PTGES</b> , <b>PXN</b> , <b>RASA1</b> , <b>RPLP0</b> , <b>RPLP2</b> , <b>SCRIB</b> , <b>SMN1/SMN2</b> , <b>SRSF1</b> , <b>SYNCRIP</b> , <b>TRAF7</b> , <b>VIM</b> , <b>WDR5</b>                      |
| 2        | Cancer, organismal injury and abnormalities, endocrine system disorders                                    | 15               | <b>ACACA</b> , <b>AKT1S1</b> , <b>APPL1</b> , <b>CCAR2</b> , <b>CDH4</b> , <b>CREBZF</b> , <b>CTNNA1</b> , <b>EIF5B</b> , <b>ENO1</b> , <b>GTF3C1</b> , <b>JUP</b> , <b>KDM5B</b> , <b>LANCL2</b> , <b>LARP1</b> , <b>MTA1</b> , <b>MTOR</b> , <b>NIPBL</b> , <b>PSME3</b> , <b>PTPRF</b> , <b>PUM1</b> , <b>RABL6</b> , <b>RALB</b> , <b>RAN</b> , <b>RB1CC1</b> , <b>RPTOR</b> , <b>RRAGC</b> , <b>RUVBL2</b> , <b>SIRT1</b> , <b>SMC1A</b> , <b>SREBF1</b> , <b>SREBF2</b> , <b>TOP2A</b> , <b>TOP2B</b> , <b>TXLNA</b> , <b>VPS39</b>                      |
| 3        | Cancer, hematological disease, immunological disease                                                       | 15               | <b>ANXA2</b> , <b>ARHGEF2</b> , <b>ATP2B1</b> , <b>BRD8</b> , <b>DUSP4</b> , <b>FBLIM1</b> , <b>FLNB</b> , <b>FZD8</b> , <b>GORASP2</b> , <b>HPGD</b> , <b>HSP90AA1</b> , <b>LPXN</b> , <b>LTBP1</b> , <b>MKI67</b> , <b>NIFK</b> , <b>PCM1</b> , <b>POLE2</b> , <b>PRIM1</b> , <b>PTX3</b> , <b>RALB</b> , <b>RGS2</b> , <b>SEC22B</b> , <b>SERPINH1</b> , <b>SMARCA4</b> , <b>SMTN</b> , <b>SOX4</b> , <b>STX16</b> , <b>STX6</b> , <b>SYNPO</b> , <b>TGFB1</b> , <b>TMSB10/TMSB4X</b> , <b>TNF</b> , <b>TOP2A</b> , <b>TP53</b> , <b>VAMP4</b>              |
| 4        | Cellular development, cellular growth and proliferation, gene expression                                   | 13               | <b>AFAP1</b> , <b>CBX3</b> , <b>CCND1</b> , <b>CDKN1C</b> , <b>DDX17</b> , <b>DDX5</b> , <b>ERRF1</b> , <b>ETV5</b> , <b>F2</b> , <b>FAM129B</b> , <b>FOXK1</b> , <b>G3BP1</b> , <b>GATAD2B</b> , <b>GDF15</b> , <b>GPB1</b> , <b>KMT2A</b> , <b>KMT2E</b> , <b>LASPI</b> , <b>MACF1</b> , <b>MUC1</b> , <b>MYCT1</b> , <b>NRIP1</b> , <b>OGT</b> , <b>PFKP</b> , <b>PGR</b> , <b>PPRC1</b> , <b>RNF2</b> , <b>RUVBL2</b> , <b>SNTB2</b> , <b>TJP2</b> , <b>TNIK</b> , <b>TRIM28</b> , <b>TRPC1</b> , <b>UBE2O</b> , <b>WDR44</b>                              |
| 5        | Hematological system development and function, lymphoid tissue structure and development, organ morphology | 13               | <b>ADD3</b> , <b>ANXA1</b> , <b>ATG16L1</b> , <b>CAV2</b> , <b>CAVIN1</b> , <b>CAVIN2</b> , <b>CAVIN3</b> , <b>CFLAR</b> , <b>DBNL</b> , <b>DNAJC15</b> , <b>EPAS1</b> , <b>ERCC5</b> , <b>GADD45A</b> , <b>HNRNPA0</b> , <b>HSP90AA1</b> , <b>IKBKKG</b> , <b>IL7</b> , <b>IL7R</b> , <b>IRF1</b> , <b>ITGB2</b> , <b>LEP</b> , <b>MAPK7</b> , <b>MIB2</b> , <b>MYL9</b> , <b>NAV1</b> , <b>NEUROG1</b> , <b>NR3C1</b> , <b>PARP4</b> , <b>PDLIM2</b> , <b>PDPK1</b> , <b>RBM5</b> , <b>SCAF11</b> , <b>SMAD4</b> , <b>TIMP3</b> , <b>TNFRSF10A</b>           |
| 6        | Cell death and survival, cellular development, cellular growth and proliferation                           | 13               | <b>ACVRL1</b> , <b>ATG9A</b> , <b>BAX</b> , <b>BCL2L1</b> , <b>BMP2</b> , <b>DNM1L</b> , <b>EEF2K</b> , <b>HIF1A</b> , <b>HK2</b> , <b>IL22</b> , <b>ITPR3</b> , <b>ITSN1</b> , <b>KRAS</b> , <b>LIMD1</b> , <b>MST1R</b> , <b>NES</b> , <b>PDGFA</b> , <b>PDK1</b> , <b>PDLIM7</b> , <b>PHLPP1</b> , <b>PRKCD</b> , <b>PRKCE</b> , <b>PRKCZ</b> , <b>PRKD3</b> , <b>RACK1</b> , <b>RB1</b> , <b>RIN2</b> , <b>RRM2</b> , <b>SART1</b> , <b>SLC2A1</b> , <b>SP1</b> , <b>TOP2A</b> , <b>TRPC1</b> , <b>YWHAE</b> , <b>ZNF148</b>                               |
| 7        | Cellular assembly and organization, cellular function and maintenance, cell morphology                     | 12               | <b>ARHGEF2</b> , <b>ARHGEF6</b> , <b>ARHGEF7</b> , <b>CEP170</b> , <b>COPB2</b> , <b>CTTNBP2</b> , <b>CTTNBP2NL</b> , <b>ERG</b> , <b>ESR1</b> , <b>FAM114A1</b> , <b>HDAC7</b> , <b>MARK2</b> , <b>MARK3</b> , <b>MOB4</b> , <b>NFKB1</b> , <b>NR1D1</b> , <b>NUPR1</b> , <b>PCNP</b> , <b>PFDN4</b> , <b>PHLDB2</b> , <b>PLK3</b> , <b>PPP2CA</b> , <b>PPP2R1B</b> , <b>PRKCI</b> , <b>PTX3</b> , <b>RAB11FIP5</b> , <b>SAFB</b> , <b>SAFB2</b> , <b>SHANK3</b> , <b>SREBF2</b> , <b>STRIP1</b> , <b>STRN</b> , <b>STRN3</b> , <b>TP53BP2</b> , <b>YWHAG</b> |
| 8        | Cell death and survival, organismal development, infectious disease                                        | 12               | <b>AGTR1</b> , <b>ANXA2</b> , <b>AP3D1</b> , <b>ATRX</b> , <b>CANX</b> , <b>CHCHD3</b> , <b>CHMP3</b> , <b>CLTC</b> , <b>EGFR</b> , <b>ERBB3</b> , <b>FASN</b> , <b>HBEGF</b> , <b>HNRNPA2B1</b> , <b>IGF2R</b> , <b>ILF3</b> , <b>ITPRID2</b> , <b>KCNH2</b> , <b>LGALS3</b> , <b>LONP1</b> , <b>MAP4K4</b> , <b>MAST4</b> , <b>NAA10</b> , <b>PDIA3</b> , <b>PIKFYVE</b> , <b>PKM</b> , <b>POSTN</b> , <b>SNX1</b> , <b>SNX2</b> , <b>SRSF1</b> , <b>STAMBP</b> , <b>TMX1</b> , <b>TRAP1</b> , <b>WASHC2A/WASHC2C</b> , <b>WASHC5</b> , <b>XRCC5</b>         |
| 9        | Cell death and survival, cellular function and maintenance, cell morphology                                | 9                | <b>ACTB</b> , <b>APP</b> , <b>ATXN2L</b> , <b>BACE1</b> , <b>BAG3</b> , <b>BAG4</b> , <b>BIN1</b> , <b>BSG</b> , <b>DDX6</b> , <b>EGFR</b> , <b>HK2</b> , <b>HSF1</b> , <b>HSP90AA1</b> , <b>HSPA5</b> , <b>HSPA8</b> , <b>HSPA9</b> , <b>IL1B</b> , <b>IL7</b> , <b>MAPT</b> , <b>NR3C1</b> , <b>NUFIP2</b> , <b>PAFAH1B2</b> , <b>PRKCA</b> , <b>PSEN1</b> , <b>ROCK2</b> , <b>SEPT2</b> , <b>SNCA</b> , <b>SPHK1</b> , <b>STAU1</b> , <b>SUMO2</b> , <b>SYK</b> , <b>TP53</b> , <b>USP8</b> , <b>XPO6</b> , <b>XRN2</b>                                     |

#Differentially expressed proteins; \*Find names of proteins in bold in Supplementary Table S7.

**Supplementary Table S13. 670 Mitochondrial proteins identified in PAH PAEC and healthy control PAEC**

| <b>Protein</b>                                             | <b>Gene</b> | <b>Fold Change</b> | <b>P-value</b> |
|------------------------------------------------------------|-------------|--------------------|----------------|
| Alanine--tRNA ligase, mitochondrial                        | AARS2       | 0.9042             | 0.2980         |
| Multidrug resistance-associated protein 1                  | ABCC1       | 0.8559             | 0.2753         |
| ATP-binding cassette sub-family D member 3                 | ABCD3       | 0.8303             | 0.1360         |
| ATP-binding cassette sub-family E member 1                 | ABCE1       | 1.0621             | 0.6061         |
| Mycophenolic acid acyl-glucuronide esterase, mitochondrial | ABHD10      | 0.9151             | 0.4560         |
|                                                            |             |                    |                |
| X-ray repair cross-complementing protein 6                 | XRCC6       | 1.1089             | 0.4639         |
| Tyrosine--tRNA ligase, cytoplasmic                         | YARS        | 0.9587             | 0.7117         |
| Tyrosine--tRNA ligase, mitochondrial                       | YARS2       | 1.3580             | 0.0310         |
| 14-3-3 protein epsilon                                     | YWHAE       | 0.9877             | 0.8819         |
| 14-3-3 protein theta                                       | YWHAQ       | 0.8930             | 0.3490         |

Fold Change, PAH to healthy controls; *P*-value, PAH vs. healthy controls.

**Supplementary Table S14. 45 mitochondrial proteins differentially expressed in PAH PAEC compared with healthy control PAEC (all  $P < 0.05$ )**

| Gene*    | Mitochondria Location                          | Up regulated (PAH/ Controls) | <i>P</i> -value | Gene    | Mitochondria Location          | Down regulated (PAH/ Controls) | <i>P</i> -value |
|----------|------------------------------------------------|------------------------------|-----------------|---------|--------------------------------|--------------------------------|-----------------|
| MTHFD1L  | Mitochondrion                                  | 1.7884                       | 0.0404          | NOS3    | Mitochondrion                  | 0.2346                         | 0.0302          |
| MRPS31   | Inner membrane, matrix, mitochondrial ribosome | 1.7364                       | 0.0017          | EBP     | Mitochondrion                  | 0.3469                         | 0.0018          |
| MRPS7    | Inner membrane, matrix, mitochondrial ribosome | 1.5766                       | 0.0259          | MTCH1   | Inner membrane                 | 0.5459                         | 0.0145          |
| GOLPH3   | Intermembrane space                            | 1.5519                       | 0.0496          | MGST1   | Inner membrane, outer membrane | 0.5780                         | 0.0160          |
| NDUFB7   | Inner membrane, intermembrane space            | 1.5018                       | 0.0009          | GSN     | Mitochondrion                  | 0.6440                         | 0.0218          |
| CASP4    | Mitochondrion                                  | 1.4773                       | 0.0363          | MGARP   | Outer membrane                 | 0.6358                         | 0.0410          |
| TM9SF4   | Mitochondrion                                  | 1.4288                       | 0.0219          | TCIRG1  | Mitochondrion                  | 0.6486                         | 0.0057          |
| NME1     | Outer membrane                                 | 1.3751                       | 0.0261          | ACAT2   | Mitochondrion                  | 0.6976                         | 0.0019          |
| PIIF     | Inner membrane, matrix                         | 1.3687                       | 0.0136          | RMDN3   | Outer membrane                 | 0.6986                         | 0.0484          |
| EC11     | Inner membrane, matrix                         | 1.3593                       | 0.0045          | SOD1    | Inner membrane, matrix         | 0.7019                         | 0.0432          |
| YARS2    | Matrix                                         | 1.3580                       | 0.0310          | AKT1    | Mitochondrion                  | 0.7279                         | 0.0187          |
| ARMCX3   | Outer membrane                                 | 1.3352                       | 0.0400          | CTSL    | Mitochondrion                  | 0.7321                         | 0.0100          |
| PPID     | Mitochondrion                                  | 1.3069                       | 0.0242          | DPYSL2  | Mitochondrion                  | 0.7269                         | 0.0490          |
| SHMT2    | Inner membrane, intermembrane space, matrix    | 1.3038                       | 0.0366          | PMPCA   | Inner membrane, matrix         | 0.7313                         | 0.0320          |
| RPL3     | Mitochondrion                                  | 1.2822                       | 0.0468          | STAT1   | Mitochondrion                  | 0.7344                         | 0.0095          |
| CLPP     | Matrix                                         | 1.2678                       | 0.0134          | IDI1    | Mitochondrion                  | 0.7392                         | 0.0199          |
| STOML2   | Inner membrane, intermembrane space            | 1.2621                       | 0.0276          | MAPK1   | Mitochondrion                  | 0.7711                         | 0.0109          |
| HSPA5    | Mitochondrion                                  | 1.2485                       | 0.0488          | SLC25A1 | Inner membrane                 | 0.7732                         | 0.0381          |
| MRPL23   | Inner membrane, matrix, mitochondrial ribosome | 1.2408                       | 0.0490          | CDIPT   | Mitochondrion                  | 0.7989                         | 0.0379          |
| MRPS28   | Inner membrane, matrix, mitochondrial ribosome | 1.2314                       | 0.0385          | LAMC1   | Mitochondrion                  | 0.8019                         | 0.0230          |
| HSP90B1  | Mitochondrion                                  | 1.2167                       | 0.0492          | CAPN1   | Mitochondrion                  | 0.8206                         | 0.0327          |
| GRPEL1   | Matrix                                         | 1.2123                       | 0.0476          | MOGS    | Mitochondrion                  | 0.8356                         | 0.0339          |
| ALDH18A1 | Inner membrane                                 | 1.2121                       | 0.0270          |         |                                |                                |                 |

\*Find names of proteins in Supplementary Table S1; *P*-value, PAH vs. healthy controls.

**Supplementary Table S15. 366 Mitochondrial phosphopeptides identified in PAH PAEC and healthy control PAEC**

| <b>Protein</b>                              | <b>Gene</b> | <b>Peptide Sequence</b> | <b>#</b> | <b>Positions<sup>&amp;</sup></b> | <b>Fold Change</b> | <b>P-value</b> |
|---------------------------------------------|-------------|-------------------------|----------|----------------------------------|--------------------|----------------|
| Multidrug resistance-associated protein 1   | ABCC1       | QISSSSYSGDISR           | 800      | 1                                | 0.8591             | 0.4231         |
| Tyrosine-protein kinase ABL1                | ABL1        | GQGESDPIDHEPAVSPHPR     | 569      | 1                                | 0.9006             | 0.5587         |
| Acetyl-CoA carboxylase 1;Biotin carboxylase | ACACA       | FIIGSVSEDNSEDEISNIVK    | 23       | 2                                | 0.4764             | 0.0014         |
| Acetyl-CoA carboxylase 1;Biotin carboxylase | ACACA       | FIIGSVSEDNSEDEISNIVK    | 25       | 1;2                              | 1.0839             | 0.8038         |
| Acetyl-CoA carboxylase 1;Biotin carboxylase | ACACA       | FIIGSVSEDNSEDEISNIVK    | 29       | 1;2                              | 1.2002             | 0.5432         |
| Vimentin                                    | VIM         | ETNIDSIPIVDTHSKR        | 438      | 1                                | 1.1317             | 0.6103         |
| Vimentin                                    | VIM         | DGQVINETSQHHDDIE        | 458      | 1                                | 0.3723             | 0.0617         |
| Vimentin                                    | VIM         | DGQVINETSQHHDDIE        | 459      | 1                                | 1.1244             | 0.6275         |
| Yorkie homolog                              | YAP1        | GDSETDIEAIFNAVMPK       | 61       | 1                                | 0.8452             | 0.5781         |
| Yorkie homolog                              | YAP1        | QASTDAGTAGAITPQHVR      | 109      | 1                                | 1.0318             | 0.8920         |

#, number of phosphorylation sites on that specific peptide; <sup>&</sup>The amino acid residue within the protein that is phosphorylated; Fold Change, PAH to healthy controls; *P*-value, PAH vs. healthy controls.

**Supplementary Table S16. 18 mitochondrial phosphopeptides differentially expressed between PAH PAEC and healthy control PAEC (all  $P < 0.05$ )**

| Gene*     | Posit ions <sup>&amp;</sup> | Mitochondr ia Location | Up regulated (PAH/ Controls) | P- value | Proteome (Fold Change) | Gene    | Positi ons <sup>&amp;</sup> | Mitochondr ia Location  | Down regulated (PAH/ Controls) | P- value | Proteome (Fold Change) |
|-----------|-----------------------------|------------------------|------------------------------|----------|------------------------|---------|-----------------------------|-------------------------|--------------------------------|----------|------------------------|
| CHCHD3    | 50                          | Inner membrane         | 2.7993                       | 0.0072   | 0.9942                 | MTOR    | 1166                        | Mitochondr ial membrane | 0.1981                         | 0.0019   |                        |
| PLEC      | 4396                        | Mitochondr ion         | 2.1967                       | 0.0313   | 1.1045                 | ITPR3   | 1832                        | Mitochondr ion          | 0.4299                         | 0.0100   | 0.8943                 |
| VIM       | 63                          | Mitochondr ion         | 2.1504                       | 0.0147   | 0.9247                 | RPLP2   | 79                          | Mitochondr ion          | 0.4312                         | 0.0247   | 0.9449                 |
| TBC1D9B   | 435                         | Mitochondr ion         | 2.1215                       | 0.0357   | 0.9332                 | ANXA1   | 5                           | Mitochondr ial membrane | 0.4542                         | 0.0057   | 0.9902                 |
| JUN       | 62                          | Mitochondr ion         | 2.0110                       | 0.0254   |                        | ACACA   | 23                          | Mitochondr ion          | 0.4764                         | 0.0014   | 0.9836                 |
| RAB11FIP5 | 359                         | Outer membrane         | 1.8613                       | 0.0262   |                        | MYH10   | 1952                        | Mitochondr ion          | 0.5205                         | 0.0047   | 0.8854                 |
| DNAJC5    | 10                          | Mitochondr ion         | 1.5948                       | 0.0232   |                        | PARP4   | 1504                        | Mitochondr ion          | 0.5734                         | 0.0453   | 0.8526                 |
|           |                             |                        |                              |          |                        | ATG16L1 | 143                         | Mitochondr ion          | 0.6141                         | 0.0047   |                        |
|           |                             |                        |                              |          |                        | SIRT1   | 16                          | Mitochondr ion          | 0.6633                         | 0.0453   |                        |
|           |                             |                        |                              |          |                        | TOP2A   | 1247                        | Mitochondr ion          | 0.6725                         | 0.0182   |                        |
|           |                             |                        |                              |          |                        | TP53BP1 | 830                         | Mitochondr ion          | 0.7059                         | 0.0207   | 1.1083                 |

\*Find names of proteins and peptide sequence in Supplementary Table S7; <sup>&</sup>The amino acid residue within the protein that is phosphorylated; *P*-value, PAH vs. healthy controls; Proteome (fold change), ratio of PAH to healthy controls.



**Supplementary Table S17. Biological functions of mitochondrial proteins differentially expressed in PAH PAEC**

| <b>Pathways</b>                                 | <b>P-value of Overlap</b> | <b>Molecules*</b>                                                                                                                                                                                                                                                          |
|-------------------------------------------------|---------------------------|----------------------------------------------------------------------------------------------------------------------------------------------------------------------------------------------------------------------------------------------------------------------------|
| Organonitrogen compound biosynthetic process    | <0.0001                   | AKT1,ALDH18A1,GOLPH3,MGST1,MOGS,MRPS28,MRPS31,MRPS7,MTHFD1L,NME1,RPL23L,RPL3,SHMT2,SLC25A1,STOML2,TCIRG1,YARS2                                                                                                                                                             |
| Organonitrogen compound metabolic process       | <0.0001                   | AKT1,ALDH18A1,CAPN1,CASP4,CDIPT,CLPP,CTSL,GOLPH3,GSN,HSP90B1,HSPA5,LAMC1,MAPK1,MGST1,MOGS,MRPS28,MRPS31,MRPS7,MTHFD1L,NDUFB7,NME1,NOS3,PMPCA,PPID,PPIF,RPL23L,RPL3,SHMT2,SLC25A1,SOD1,STOML2,TCIRG1,YARS2                                                                  |
| Organic substance metabolic process             | <0.0001                   | ACAT2,AKT1,ALDH18A1,CAPN1,CASP4,CDIPT,CLPP,CTSL,DPYSL2,EBP,ECI1,GOLPH3,GSN,HSP90B1,HSPA5,IDI1,LAMC1,MAPK1,MGST1,MOGS,MRPS28,MRPS31,MRPS7,MTHFD1L,NDUFB7,NME1,NOS3,PMPCA,PPID,PPIF,RPL23L,RPL3,SHMT2,SLC25A1,SOD1,STAT1,STOML2,TCIRG1,YARS2                                 |
| Small molecule metabolic process                | 0.0001                    | ACAT2,AKT1,ALDH18A1,CDIPT,EBP,ECI1,IDI1,MAPK1,MTHFD1L,NDUFB7,NME1,NOS3,SHMT2,SLC25A1,STOML2,TCIRG1,YARS2                                                                                                                                                                   |
| Cellular metabolic process                      | 0.0001                    | ACAT2,AKT1,ALDH18A1,CAPN1,CDIPT,CLPP,CTSL,DPYSL2,ECI1,GOLPH3,GSN,HSP90B1,HSPA5,IDI1,LAMC1,MAPK1,MGST1,MOGS,MRPS28,MRPS31,MRPS7,MTHFD1L,NDUFB7,NME1,NOS3,PMPCA,PPID,PPIF,RPL23L,RPL3,SHMT2,SLC25A1,SOD1,STAT1,STOML2,TCIRG1,YARS2                                           |
| Primary metabolic process                       | 0.0001                    | ACAT2,AKT1,ALDH18A1,CAPN1,CASP4,CDIPT,CLPP,CTSL,DPYSL2,EBP,ECI1,GOLPH3,GSN,HSP90B1,HSPA5,IDI1,LAMC1,MAPK1,MOGS,MRPS28,MRPS31,MRPS7,MTHFD1L,NDUFB7,NME1,NOS3,PMPCA,PPID,PPIF,RPL23L,RPL3,SHMT2,SLC25A1,STAT1,STOML2,TCIRG1,YARS2                                            |
| Cellular component organization                 | 0.0001                    | AKT1,CLPP,CTSL,DPYSL2,GOLPH3,GRPEL1,GSN,HSP90B1,LAMC1,MAPK1,MGARP,MGST1,MRPS28,MRPS31,MRPS7,MTCH1,NDUFB7,NOS3,PMPCA,PPID,PPIF,RPL23L,RPL3,SHMT2,SOD1,STOML2,TCIRG1,TM9SF4                                                                                                  |
| Nitrogen compound metabolic process             | 0.0003                    | AKT1,ALDH18A1,CAPN1,CASP4,CDIPT,CLPP,CTSL,DPYSL2,GOLPH3,GSN,HSP90B1,HSPA5,LAMC1,MAPK1,MGST1,MOGS,MRPS28,MRPS31,MRPS7,MTHFD1L,NDUFB7,NME1,NOS3,PMPCA,PPID,PPIF,RPL23L,RPL3,SHMT2,SLC25A1,SOD1,STAT1,STOML2,TCIRG1,YARS2                                                     |
| Protein metabolic process                       | 0.0003                    | AKT1,CAPN1,CASP4,CLPP,CTSL,GOLPH3,GSN,HSP90B1,HSPA5,LAMC1,MAPK1,MOGS,MRPS28,MRPS31,MRPS7,PMPCA,PPID,PPIF,RPL23L,RPL3,SHMT2,STOML2,TCIRG1,YARS2                                                                                                                             |
| Biosynthetic process                            | 0.0005                    | ACAT2,AKT1,ALDH18A1,CDIPT,EBP,GOLPH3,IDI1,MAPK1,MGST1,MOGS,MRPS28,MRPS31,MRPS7,MTHFD1L,NME1,NOS3,RPL23L,RPL3,SHMT2,SLC25A1,SOD1,STAT1,STOML2,TCIRG1,YARS2                                                                                                                  |
| Protein-containing complex subunit organization | 0.0005                    | CLPP,GSN,LAMC1,MGST1,MRPS28,MRPS31,MRPS7,NDUFB7,PPID,RPL23L,RPL3,SHMT2,STOML2,TCIRG1,TM9SF4                                                                                                                                                                                |
| Cellular protein metabolic process              | 0.0009                    | AKT1,CLPP,CTSL,GSN,HSP90B1,HSPA5,LAMC1,MAPK1,MOGS,MRPS28,MRPS31,MRPS7,PMPCA,PPID,PPIF,RPL23L,RPL3,SHMT2,STOML2,TCIRG1,YARS2                                                                                                                                                |
| Cellular process                                | 0.0014                    | ACAT2,AKT1,ALDH18A1,CAPN1,CASP4,CDIPT,CLPP,CTSL,DPYSL2,EBP,ECI1,GOLPH3,GRPEL1,GSN,HSP90B1,HSPA5,IDI1,LAMC1,MAPK1,MGARP,MGST1,MOGS,MRPS28,MRPS31,MRPS7,MTCH1,MTHFD1L,NDUFB7,NME1,NOS3,PMPCA,PPID,PPIF,RMDN3,RPL23L,RPL3,SHMT2,SLC25A1,SOD1,STAT1,STOML2,TCIRG1,TM9SF4,YARS2 |
| Transport                                       | 0.0014                    | AKT1,CAPN1,DPYSL2,EBP,GOLPH3,GRPEL1,GSN,HSP90B1,HSPA5,MAPK1,MGARP,MGST1,NME1,PMPCA,PPID,PPIF,RPL3,SLC25A1,SOD1,STOML2,TCIRG1,TM9SF4                                                                                                                                        |
| Localization                                    | 0.0016                    | AKT1,ARMCX3,CAPN1,DPYSL2,EBP,GOLPH3,GRPEL1,GSN,HSP90B1,HSPA5,LAMC1,MAPK1,MGARP,MGST1,NME1,NOS3,PMPCA,PPID,PPIF,RPL3,SLC25A1,SOD1,STOML2,TCIRG1,TM9SF4                                                                                                                      |

|                                        |        |                                                                                                                                                 |
|----------------------------------------|--------|-------------------------------------------------------------------------------------------------------------------------------------------------|
| Cellular biosynthetic process          | 0.0018 | AKT1,ALDH18A1,CDIPT,GOLPH3,IDI1,MAPK1,MGST1,MOGS,MRPS28,MRPS31,MRPS7,MTHFD1L,NME1,NOS3,RPL23L,RPL3,SHMT2,SLC25A1,SOD1,STAT1,STOML2,TCIRG1,YARS2 |
| Organic substance biosynthetic process | 0.0022 | ACAT2,AKT1,ALDH18A1,CDIPT,EBP,GOLPH3,IDI1,MAPK1,MGST1,MOGS,MRPS28,MRPS31,MRPS7,MTHFD1L,NME1,RPL23L,RPL3,SHMT2,SLC25A1,STAT1,STOML2,TCIRG1,YARS2 |
| Immune system process                  | 0.0043 | AKT1,CAPN1,CASP4,CTSL,EBP,GOLPH3,GSN,HSP90B1,MAPK1,MGST1,SHMT2,SOD1,STAT1,STOML2,TCIRG1                                                         |
| Cellular response to chemical stimulus | 0.0044 | AKT1,CASP4,CTSL,GSN,HSP90B1,HSPA5,MAPK1,MGARP,MGST1,NME1,NOS3,PPIF,RPL3,SOD1,STAT1,TCIRG1                                                       |
| Response to organic substance          | 0.0070 | AKT1,CASP4,CTSL,GSN,HSP90B1,HSPA5,MAPK1,MGARP,MGST1,NME1,NOS3,RPL3,SHMT2,SOD1,STAT1,TCIRG1                                                      |
| Response to chemical                   | 0.0078 | AKT1,CASP4,CTSL,DPYSL2,EBP,GSN,HSP90B1,HSPA5,MAPK1,MGARP,MGST1,NME1,NOS3,PPIF,RPL3,SHMT2,SLC25A1,SOD1,STAT1,TCIRG1                              |

\*Find names of proteins in Supplementary Table S1.

**Supplementary Table S18. Top biological processes of mitochondrial phosphoproteins differentially expressed in PAH PAEC**

| <b>Pathways</b>                               | <b>P-value of Overlap</b> | <b>Molecules*</b>                                                            |
|-----------------------------------------------|---------------------------|------------------------------------------------------------------------------|
| Response to stress                            | 0.0172                    | ANXA1,ATG16L1,ITPR3,JUN,MTOR,MYH10,PARP4,SIRT1,TOP2A,TP53BP1,VIM             |
| Cellular response to stress                   | 0.0172                    | ANXA1,JUN,MTOR,PARP4,SIRT1,TOP2A,TP53BP1                                     |
| Cellular component organization               | 0.0172                    | ACACA,ANXA1,ATG16L1,CHCHD3,ITPR3,JUN,MTOR,MYH10,PLEC,SIRT1,TOP2A,TP53BP1,VIM |
| Negative regulation of biological process     | 0.0172                    | ANXA1,CHCHD3,DNAJC5,ITPR3,JUN,MTOR,RAB11FIP5,RPLP2,SIRT1,TOP2A,TP53BP1,VIM   |
| Regulation of biological quality              | 0.0172                    | ACACA,ANXA1,DNAJC5,ITPR3,JUN,MTOR,MYH10,RAB11FIP5,SIRT1,VIM                  |
| Cellular localization                         | 0.0172                    | ACACA,ATG16L1,DNAJC5,ITPR3,MYH10,RAB11FIP5,RPLP2,TBC1D9B                     |
| Establishment of localization in cell         | 0.0172                    | ACACA,DNAJC5,ITPR3,MYH10,RAB11FIP5,RPLP2,TBC1D9B                             |
| Negative regulation of cellular process       | 0.0192                    | ANXA1,CHCHD3,DNAJC5,ITPR3,JUN,MTOR,RAB11FIP5,SIRT1,TP2A,TP53BP1,VIM          |
| Regulation of cellular component organization | 0.0192                    | ANXA1,JUN,MTOR,MYH10,SIRT1,TBC1D9B,TP2A,VIM                                  |
| Regulation of transport                       | 0.0192                    | ANXA1,ITPR3,MTOR,MYH10,RAB11FIP5,SIRT1,TBC1D9B                               |

\*Find names of proteins in Supplementary Table S7.

**Supplementary Table S19. Clinical features of study participants for metabolomics**

|                                                                                             | <b>Controls (n = 12)</b> | <b>PAH (n = 30)</b> | <b>P-value</b> |
|---------------------------------------------------------------------------------------------|--------------------------|---------------------|----------------|
| Mean age, yr                                                                                | 42 ± 3                   | 44 ± 2              | 0.5            |
| Gender, M/F                                                                                 | 2/10                     | 9/21                | 0.3            |
| Ethnicity, W/AA/other                                                                       | 11/1/0                   | 23/6/1              | 0.4            |
| Cardiac output, l/min                                                                       | 3.8 ± 0.2                | 4.7 ± 0.2           | 0.01           |
| PVR, wood unit                                                                              | 1.4 ± 0.1                | 2.7 ± 0.2           | <0.0001        |
| RVSP, mm Hg                                                                                 | 25 ± 1                   | 67 ± 4              | <0.0001        |
| O2 saturation, % of Hgb                                                                     | 98.6 ± 0.5               | 96.3 ± 0.4          | 0.002          |
| 6 minute walk distance, feet                                                                | NA                       | 1513 ± 69           |                |
| <b>Medications</b>                                                                          |                          |                     |                |
| Phosphodiesterase type 5 inhibitor or stimulator of soluble guanylate cyclase, <i>n</i> (%) | NA                       | 24 (80%)            |                |
| Endothelin receptor antagonist, <i>n</i> (%)                                                | NA                       | 19 (63%)            |                |
| Prostacyclin or prostacyclin receptor agonist, <i>n</i> (%)                                 | NA                       | 16 (53%)            |                |

Mean ± SEM; *P*-value, PAH vs. controls; M, male; F, female; W, white; AA, African American; PVR, pulmonary vascular resistance; RVSP, right ventricular systolic pressure; Hgb, hemoglobin; NA, not applicable; Phosphodiesterase type 5 inhibitors and stimulators of soluble guanylate cyclase include tadalafil and sildenafil; endothelin receptor antagonist includes bosentan, ambrisentan and macitentan; prostacyclin and prostacyclin receptor agonist include treprostinil and epoprostenol<sup>1,2,3</sup>.

**Supplementary Table S20. Metabolite analysis in PAH versus healthy controls (PAHTCH Study)**

| <b>Biochemical Name</b>           | <b>Platform</b> | <b>Comp ID</b> | <b>Super Pathway</b> | <b>Fold Change</b> | <b>P-value</b> |
|-----------------------------------|-----------------|----------------|----------------------|--------------------|----------------|
| 1-arachidonylglycerol (20:4)      | LC/MS neg       | 34397          | Lipid                | 1.1204             | 0.6445         |
| 1-dihomo-linolenylglycerol (20:3) | LC/MS neg       | 48341          | Lipid                | 1.0472             | 0.6873         |
| 1-linoleoylglycerol (18:2)        | LC/MS neg       | 27447          | Lipid                | 1.0116             | 0.8344         |
| 1-methylhistidine                 | LC/MS neg       | 30460          | Amino Acid           | 1.2692             | 0.1594         |
| 1-methylimidazoleacetate          | LC/MS pos early | 32350          | Amino Acid           | 1.6121             | 0.0001         |
|                                   |                 |                |                      |                    |                |
| xanthine                          | LC/MS polar     | 3147           | Nucleotide           | 1.4579             | 0.0758         |
| xanthosine                        | LC/MS neg       | 15136          | Nucleotide           | 1.6882             | 0.0488         |
| xanthurenate                      | LC/MS neg       | 15679          | Amino Acid           | 0.5325             | 0.1109         |
| ximenoylcarnitine (C26:1)         | LC/MS pos late  | 57517          | Lipid                | 1.1944             | 0.2022         |
| xylose                            | LC/MS polar     | 15581          | Carbohydrate         | 0.6874             | 0.5558         |

Fold Change, PAH to healthy controls; *P*-value, PAH vs. healthy controls; NA, not available.

**Supplementary Table S21. Purity of PAEC used for all experiments as assessed with CD31**

| <b>PAEC</b> | <b>%CD31 Positive</b> |
|-------------|-----------------------|
| Control 1*  | 99.2                  |
| Control 2*  | 99.9                  |
| Control 3   | 99.8                  |
| Control 4   | 97.2                  |
| Control 5   | 98.4                  |
| Control 6   | 99.7                  |
| Control 7   | 99.7                  |
| Control 8   | 99.7                  |
| Control 9   | 99.9                  |
| Control 10  | 99.9                  |
| Control 11  | 99.9                  |
| Control 12  | 96.8                  |
| Control 13* | 99.2                  |
| Control 14* | 97.1                  |
| PAH 1       | 97.1                  |
| PAH 2       | 97.5                  |
| PAH 3       | 97.8                  |
| PAH 4       | 97.4                  |
| PAH 5       | 97.4                  |
| PAH 6       | 98.7                  |
| PAH 7       | 98.0                  |
| PAH 8       | 99.1                  |
| PAH 9       | 97.1                  |
| PAH 10      | 98.8                  |
| PAH 11      | 99.9                  |
| PAH 12      | 98.7                  |
| PAH 13      | 97.1                  |
| PAH 14      | 97.5                  |
| PAH 15      | 99.0                  |

\*Commercially purchased

Supplementary Figure 1

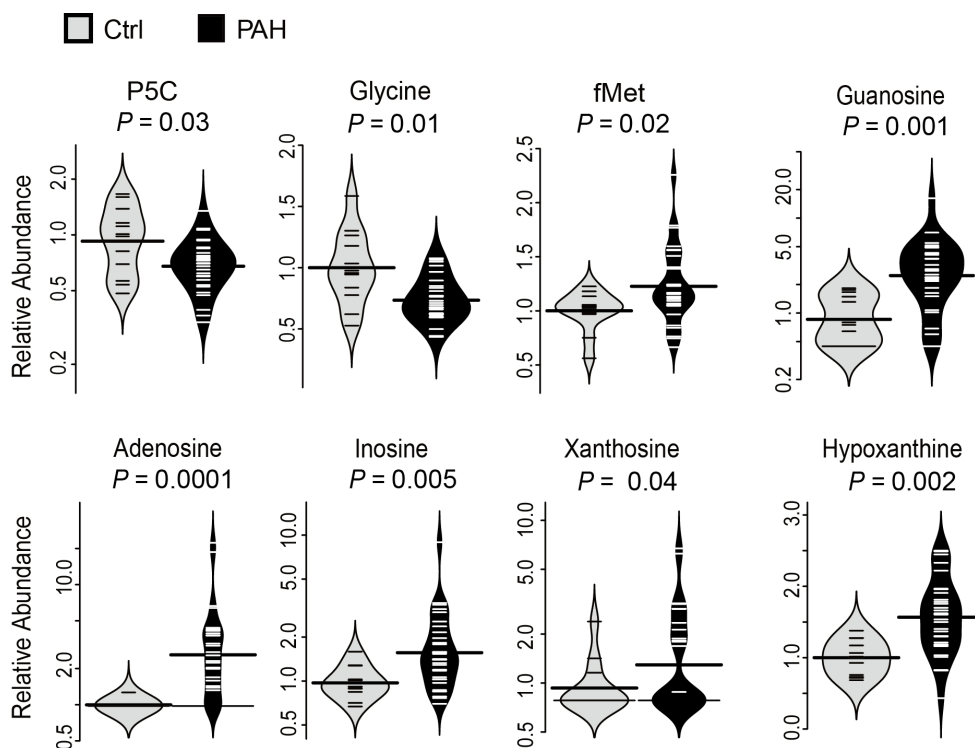

**Supplementary Fig. S1** Nontargeted metabolites in PAH. Relative abundances of  $\Delta^1$ -pyrroline-5-carboxylate (P5C), glycine, N-formylmethionine (fMet), guanosine, adenosine, inosine, xanthosine, and hypoxanthine in plasma were significantly different between PAH ( $n = 30$ ) and healthy controls ( $n = 12$ ). Beanplots were prepared using R 3.5.1.

Supplementary Figure 2

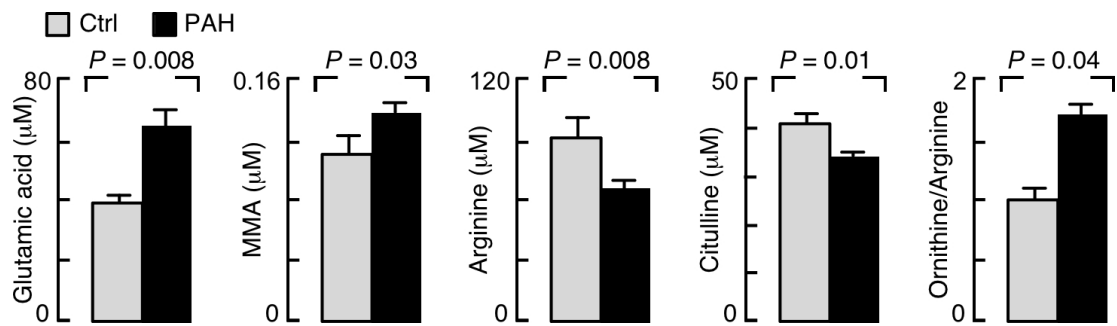

**Supplementary Fig. S2** Targeted HPLC measures of metabolites in PAH. The concentration of glutamic acid, monomethylarginine (MMA), arginine, citrulline, and ratio of ornithine/arginine, a surrogate for arginase activity, in plasma were significantly different between PAH ( $n = 30$ ) and healthy controls ( $n = 12$ ) (means  $\pm$  SEM).



Supplementary Figure 3

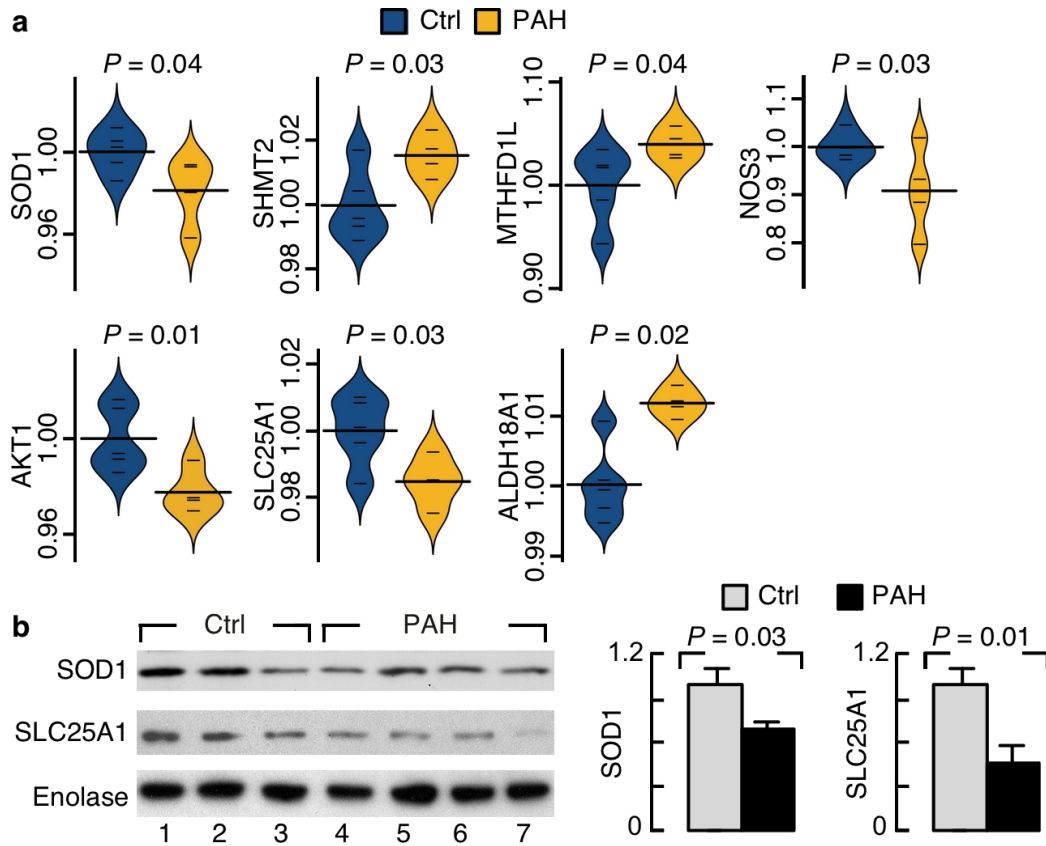

**Supplementary Fig. S3 Mitochondrial protein expression in PAH.** (a) Beanplots showing differential expression of the mitochondrial proteins SOD1, SHMT2, MTHFD1L, NOS3, AKT1, SLC25A1 and ALDH18A1 between PAH PAEC ( $n = 4$ ) and healthy control PAEC ( $n = 5$ ). (b) Decreased SOD1 and SLC25A1 protein expression was confirmed in PAH PAEC by Western blot. Enolase as a loading control. Replicate samples run on parallel gels are presented. Relative units (means  $\pm$  SEM) in PAH PAEC and healthy control PAEC (SOD1, Ctrl  $n = 7$ , PAH  $n = 7$ ; SLC25A1, Ctrl  $n = 5$ , PAH  $n = 4$ ; two-tailed t-test). AKT1, RAC-alpha serine/threonine-protein kinase; ALDH18A1, delta-1-pyrroline-5-carboxylate synthase; MTHFD1L, monofunctional C1-tetrahydrofolate (THF) synthase; NOS3, endothelial nitric oxide synthase; SHMT2, serine hydroxymethyltransferase; SLC25A1, tricarboxylate transport protein; SOD1, superoxide dismutase [Cu-Zn].

**Supplementary Figure 4**

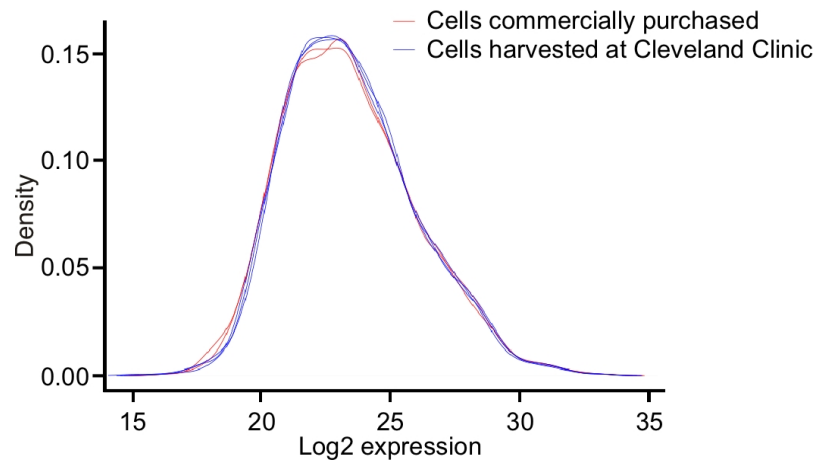

**Supplementary Fig. S4** Overall expression of proteins was identical among control PAEC from commercially purchased ( $n = 2$ ) and harvested at Cleveland Clinic ( $n = 3$ ).

## Supplementary Methods

**Human samples.** Plasma samples were obtained from 30 PAH patients and 12 healthy controls as part of the PAH Treatment with Carvedilol for Heart Failure (PAHTCH) trial (Cleveland Clinic IRB study number 11-1198) <sup>1,2,3</sup>.

**Flow cytometry.** CellROX Green fluorogenic probe (Life Technologies) was used to quantify reactive oxygen species (ROS) by flow cytometry. Cell suspensions of PAEC in culture medium (0.25 x 10<sup>6</sup>/100  $\mu$ L) were stained with 5  $\mu$ M probe per manufacturer's instructions. ROS generation was induced by incubation of cells with 100  $\mu$ M menadione prior to CellROX staining. Cells treated with vehicle alone were used as a control to determine autofluorescence and to set gating boundaries for CellROX. Samples were acquired using an LSRII (Becton Dickinson) flow cytometer. CellROX Green was excited using a 488 nm laser line and fluorescence signals were collected using a 525/50 bandpass filter. 100,000 events were acquired.

**Western blot analyses.** Whole cell lysates were prepared as previously described <sup>4</sup>. Equal amounts of protein (80  $\mu$ g) were loaded per lane. Protein was separated by electrophoresis on a 4–15% Tris-HCl (Bio-Rad Lab, Hercules, CA) and transferred onto polyvinylidene difluoride membranes (PVDF, Millipore Corporation, Bedford, MA). Amersham ECL Western blot detection reagents, Amersham Hyperfilm ECL (GE Healthcare Life Sciences) and Kodak M35 X-OMAT Automatic Processors (Rochester, NY) were used for detection of signals. Antibodies included rabbit anti-Enolase (sc-15343), SOD1 (sc-11407, Santa Cruz Biotechnology, Santa Cruz, CA) and SLC25A1 (Thermo Fisher Scientific, Waltham, MA, #PA5-42451) polyclonal Ab and anti-rabbit (NA9340)(GE Healthcare Life Sciences, Marlborough, MA) secondary Ab.

**Amino acid analysis.** Plasma amino acid concentrations were measured using HPLC (Agilent 1100 series HPLC; Agilent Technologies, Wilmington, DE), following *ortho*-phthalaldehyde derivatization using a fluorescent detector as described previously <sup>5</sup>.

## References

1. Farha, S., *et al.* Pulmonary arterial hypertension treatment with carvedilol for heart failure: a randomized controlled trial. *JCI Insight* **2**, (2017).
2. Cheong, H. I., *et al.* Endothelial Phenotype Evoked by Low Dose Carvedilol in Pulmonary Hypertension. *Front Cardiovasc Med* **5**, 180 (2018).
3. Saygin, D., *et al.* Metabolic and Functional Evaluation of the Heart and Lungs in Pulmonary Hypertension by Gated 2-[18F]-Fluoro-2-deoxy-D-glucose Positron Emission Tomography. *Pulm Circ* **7**, 428-438 (2017).
4. Xu, W., *et al.* STAT-1 and c-Fos interaction in nitric oxide synthase-2 gene activation. *Am J Physiol Lung Cell Mol Physiol* **285**, L137-148 (2003).
5. Comhair, S. A., *et al.* Metabolomic Endotype of Asthma. *J Immunol* **195**, 643-650 (2015).
